# Supplementary material for: Photoinduced sequence-control via one pot living radical polymerization of acrylates
Source: Royal Society of Chemistry journal article supplement (doi:10.1039/c4sc01374c), 2014-01-01
Supplement: c4sc01374c1.pdf [file c4sc01374c1.pdf]

## Supplementary Information

### Photoinduced sequence-control via one pot living radical polymerization of acrylates

Athina Anastasaki,<sup>1</sup> Vasiliki Nikolaou,<sup>1</sup> George S. Pappas,<sup>2</sup> Qiang Zhang,<sup>1</sup> Chaoying Wan,<sup>2</sup> Paul Wilson,<sup>1,3</sup> Thomas P. Davis,<sup>1,3</sup> Michael R. Whittaker,<sup>1,3\*</sup> David M. Haddleton<sup>1,3\*</sup>

<sup>1</sup> Department of Chemistry, University of Warwick, Coventry CV4 7AL, UK

<sup>2</sup> Warwick Manufacturing Group, University of Warwick, Coventry CV4 7AL, UK

<sup>3</sup> Monash Institute of Pharmaceutical Sciences, Monash University, Parkville, Australia

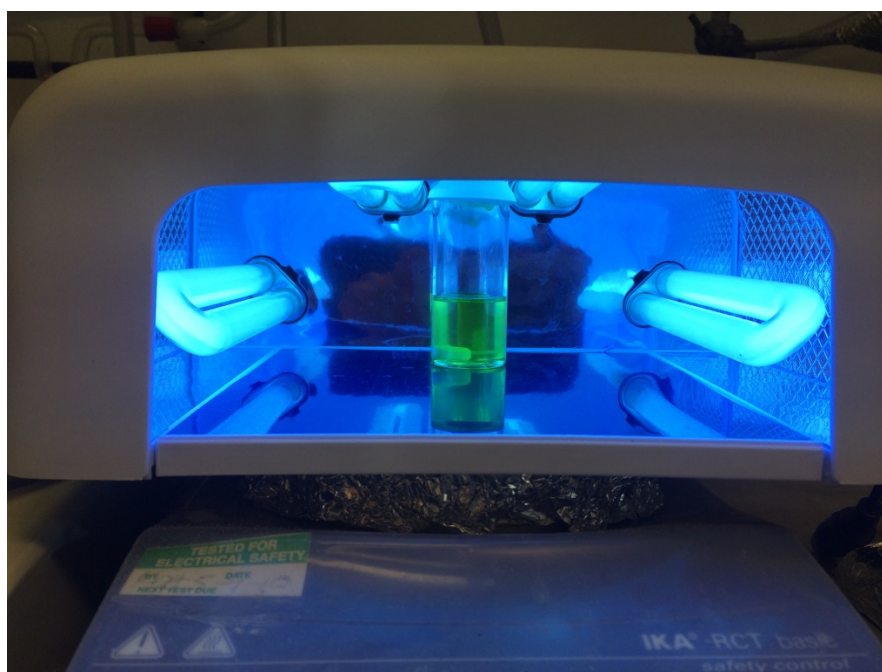

**Figure S1:** Typical set up for **photoinduced** polymerisation ( $\lambda= 360\text{nm}$ ).

## Materials

All materials were purchased from Sigma Aldrich or Fischer Scientific unless otherwise stated. Copper (II) bromide ( $\text{Cu}^{\text{II}}\text{Br}_2$ ) and ethyl 2-bromoisobutyrate (EBiB) were used as received. All monomers were passed through a basic  $\text{Al}_2\text{O}_3$  chromatographic column prior to use. Tris-(2-(dimethylamino)ethyl)amine ( $\text{Me}_6\text{TREN}$ ) was synthesized according to previously reported literature.<sup>1</sup> Solketal acrylate was synthesized according to a reported procedure and distilled under reduced pressure ( $45^\circ\text{C}$ ,  $10^{-1}$  mbar) to yield a colourless liquid.<sup>2</sup>

## Instruments

$^1\text{H}$  NMR spectra were recorded on Bruker DPX-250 and DPX-300 spectrometers using deuterated chloroform ( $\text{CDCl}_3$ ) obtained from Aldrich. Chemical shifts are given in ppm downfield from the internal standard tetramethylsilane. Size exclusion chromatography (SEC) measurements were conducted using an Agilent 1260 GPC-MDS fitted with differential refractive index (DRI), light scattering (LS) and viscometry (VS) detectors equipped with  $2 \times$  PLgel 5 mm mixed-D columns ( $300 \times 7.5$  mm),  $1 \times$  PLgel 5 mm guard column ( $50 \times 7.5$  mm) and autosampler. Narrow linear poly(methyl methacrylate) standards in range of 200 to  $1.0 \times 10^6$  g·mol<sup>-1</sup> were used to calibrate the system. All samples were passed through  $0.45 \mu\text{m}$  PTFE filter before analysis. The mobile phase was chloroform with 2% triethylamine eluent at a flow rate of 1.0 mL/min. SEC data was analyzed using Cirrus v3.3 with calibration curves produced using Varian Polymer laboratories Easi-Vials linear poly(methyl methacrylate) standards (200- $4.7 \times 10^5$  g/mol). ESI-ToF spectra were recorded on Bruker MicroTOF. Samples were loaded by direct infusion at a flow rate of 240  $\mu\text{L/hr}$  in  $\text{MeOH:H}_2\text{O}$ . The source of UV light was a UV nail gel curing lamp (available online from a range of suppliers) ( $\lambda_{\text{max}} \sim 360$  nm) equipped with four 9W bulbs.

## General procedure for the preparation of multiblock (co)polymer by photoinduced living radical polymerization without purification.

Filtered monomer ( $\text{DP}_n$  eq), EBiB (1 eq),  $\text{CuBr}_2$  (0.02 eq),  $\text{Me}_6\text{-Tren}$  (0.12 eq) and DMSO (2 mL) were added to a septum sealed vial and degassed by purging with nitrogen for 15 min.

Polymerization commenced upon addition of the degassed reaction mixture to the UV lamp. Samples were taken periodically and conversions were measured using  $^1\text{H}$  NMR and SEC analysis.

For the iterative chain extensions, an aliquot of a degassed monomer ( $\text{DP}_n$  eq), in DMSO (50% *v/v*) was added *via* a nitrogen-purged syringe and again the solution was allowed to polymerize in the lamp. When required (according to the manuscript), a fresh solution of  $\text{CuBr}_2$  (0.02 eq),  $\text{Me}_6\text{-Tren}$  (0.12 eq) in DMSO was fed together with the monomer *via* a nitrogen-purged syringe. The above polymerization-extension procedure was repeated as required.

## DP=3

**Scheme S1:** Synthesis of **multiblock homopolymers DP=3** by sequential addition of monomers without intermediate purification.

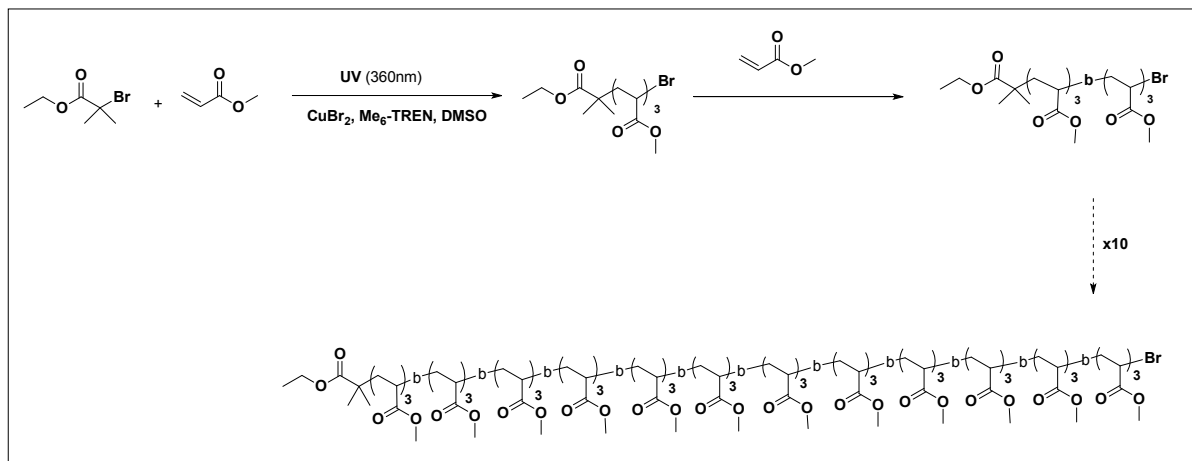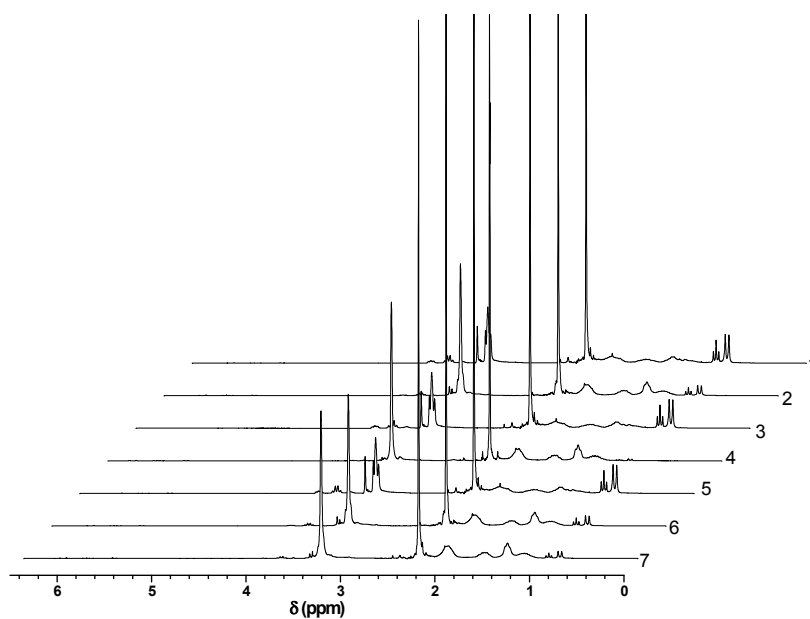

**Figure S2:**  $^1\text{H}$  NMR spectra showing the monomer conversion for each cycle during synthesis of heptablock homopolymer **DP=3** in  $\text{DMSO}$  at ambient temperature.

**Table S1:** Characterization data for the synthesis of the pseudo heptablock homopolymer **DP=3** obtained from UV experiment:  $[\text{MA}]:[\text{EBiB}]:[\text{CuBr}_2]:[\text{Me}_6\text{-Tren}] = [2]:[1]:[0.02]:[0.12]$  in DMSO at ambient temperature.

| Cycle | Multiblock homopolymer composition                                                                                           | Time (h) | Monomer conversion <sup>a</sup> (%) | $M_{n,\text{th}}$ [g mol <sup>-1</sup> ] | $M_{n,\text{GPC}}$ <sup>b</sup> [g mol <sup>-1</sup> ] | $\bar{D}$ |
|-------|------------------------------------------------------------------------------------------------------------------------------|----------|-------------------------------------|------------------------------------------|--------------------------------------------------------|-----------|
| 1     | Poly(MA <sub>3</sub> )                                                                                                       | 12       | 99                                  | 450                                      | 300                                                    | 1.39      |
| 2     | Poly(MA <sub>3</sub> -MA <sub>3</sub> )                                                                                      | 12       | 100                                 | 710                                      | 700                                                    | 1.19      |
| 3     | Poly(MA <sub>3</sub> -MA <sub>3</sub> -MA <sub>3</sub> )                                                                     | 12       | 100                                 | 970                                      | 1300                                                   | 1.17      |
| 4     | Poly(MA <sub>3</sub> -MA <sub>3</sub> -MA <sub>3</sub> -MA <sub>3</sub> )                                                    | 15       | 98                                  | 1230                                     | 2600                                                   | 1.09      |
| 5     | Poly(MA <sub>3</sub> -MA <sub>3</sub> -MA <sub>3</sub> -MA <sub>3</sub> -MA <sub>3</sub> )                                   | 18       | 100                                 | 1500                                     | 3400                                                   | 1.07      |
| 6     | Poly(MA <sub>3</sub> -MA <sub>3</sub> -MA <sub>3</sub> -MA <sub>3</sub> -MA <sub>3</sub> -MA <sub>3</sub> )                  | 26       | 99                                  | 1750                                     | 4000                                                   | 1.10      |
| 7     | Poly(MA <sub>3</sub> -MA <sub>3</sub> -MA <sub>3</sub> -MA <sub>3</sub> -MA <sub>3</sub> -MA <sub>3</sub> -MA <sub>3</sub> ) | 48       | 96                                  | 2010                                     | 4700                                                   | 1.18      |

<sup>a</sup>Determined by <sup>1</sup>H NMR. <sup>b</sup>Determined by CHCl<sub>3</sub> SEC analysis.

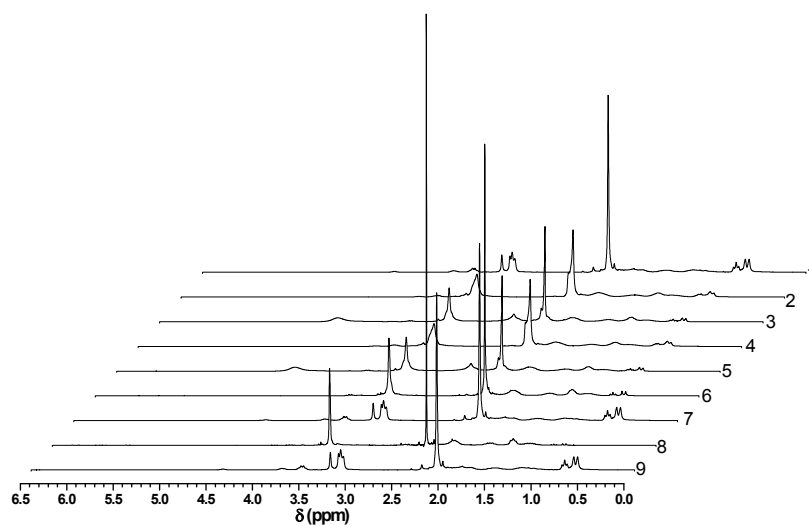

**Figure S3:** <sup>1</sup>H NMR spectra showing the monomer conversion for each cycle during synthesis of nonablock homopolymer **DP=3** in DMSO at ambient temperature. A fresh solution of  $[\text{CuBr}_2]:[\text{Me}_6\text{-Tren}] = [0.02]:[0.12]$ , was added together with the monomer upon every 2<sup>nd</sup> addition. **No additional solvent** was added.

**Table S2:** Characterization data for the synthesis of the nonablock homopolymer obtained from UV experiment. Initial feed ratio =  $[\text{MA}]:[\text{EBiB}]:[\text{CuBr}_2]:[\text{Me}_6\text{-Tren}] = [3]:[1]:[0.02]:[0.12]$  in DMSO at ambient temperature.

| Cycle | Multiblock copolymer composition                                                                                                                               | Time (h) | Monomer conversion <sup>a</sup> (%) | M <sub>n,th</sub> [g mol <sup>-1</sup> ] | M <sub>n,GPC</sub> <sup>b</sup> [g mol <sup>-1</sup> ] | <i>D</i> |
|-------|----------------------------------------------------------------------------------------------------------------------------------------------------------------|----------|-------------------------------------|------------------------------------------|--------------------------------------------------------|----------|
| 1     | Poly(MA <sub>3</sub> )                                                                                                                                         | 12       | 100                                 | 450                                      | 260                                                    | 1.26     |
| 2     | Poly(MA <sub>3</sub> -MA <sub>3</sub> )                                                                                                                        | 12       | 100                                 | 710                                      | 650                                                    | 1.23     |
| 3     | Poly(MA <sub>3</sub> -MA <sub>3</sub> -MA <sub>3</sub> )                                                                                                       | 12       | 100                                 | 970                                      | 1200                                                   | 1.20     |
| 4     | Poly(MA <sub>3</sub> -MA <sub>3</sub> -MA <sub>3</sub> -MA <sub>3</sub> )                                                                                      | 12       | 100                                 | 1230                                     | 1800                                                   | 1.18     |
| 5     | Poly(MA <sub>3</sub> -MA <sub>3</sub> -MA <sub>3</sub> -MA <sub>3</sub> -MA <sub>3</sub> )                                                                     | 12       | 100                                 | 1500                                     | 2400                                                   | 1.12     |
| 6     | Poly(MA <sub>3</sub> -MA <sub>3</sub> -MA <sub>3</sub> -MA <sub>3</sub> -MA <sub>3</sub> -MA <sub>3</sub> )                                                    | 12       | 99                                  | 1750                                     | 3400                                                   | 1.10     |
| 7     | Poly(MA <sub>3</sub> -MA <sub>3</sub> -MA <sub>3</sub> -MA <sub>3</sub> -MA <sub>3</sub> -MA <sub>3</sub> -MA <sub>3</sub> )                                   | 12       | 99                                  | 2010                                     | 5100                                                   | 1.15     |
| 8     | Poly(MA <sub>3</sub> -MA <sub>3</sub> )                  | 12       | 99                                  | 2270                                     | 6100                                                   | 1.33     |
| 9     | Poly(MA <sub>3</sub> -MA <sub>3</sub> ) | 14       | 95                                  | 2530                                     | 8000                                                   | 1.35     |

<sup>a</sup>Determined by <sup>1</sup>H NMR. <sup>b</sup>Determined by CHCl<sub>3</sub> SEC analysis.

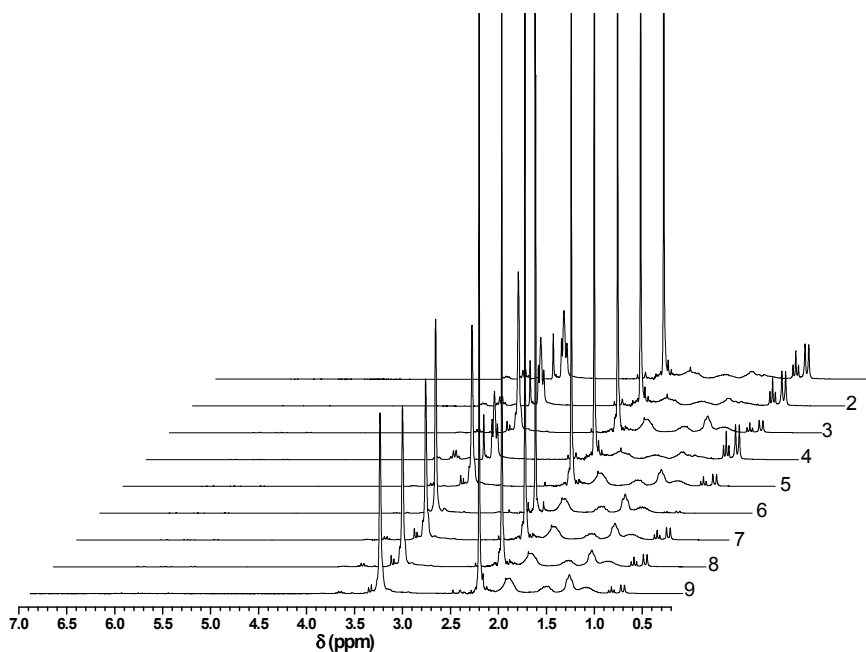

**Figure S4:** <sup>1</sup>H NMR spectra showing the monomer conversion for each cycle during synthesis of nonablock homopolymer **DP=3** in DMSO at ambient temperature. A fresh solution of [CuBr<sub>2</sub>]:[Me<sub>6</sub>-Tren] = [0.02]:[0.12], was added together with the monomer upon every 4<sup>th</sup> addition..

**Table S3:** Characterization data for the synthesis of the pseudo nonablock copolymer **DP=3** obtained from UV experiment. Initial feed ratio =  $[\text{MA}]:[\text{EBiB}]:[\text{CuBr}_2]:[\text{Me}_6\text{-Tren}] = [3]:[1]:[0.02]:[0.12]$  in DMSO at ambient temperature.

| Cycle | Multiblock copolymer composition                                                                                                                               | Time (h) | Monomer conversion <sup>a</sup> (%) | $M_{n,\text{th}}$ [g mol <sup>-1</sup> ] | $M_{n,\text{GPC}}^b$ [g mol <sup>-1</sup> ] | $\bar{D}$ |
|-------|----------------------------------------------------------------------------------------------------------------------------------------------------------------|----------|-------------------------------------|------------------------------------------|---------------------------------------------|-----------|
| 1     | Poly(MA <sub>3</sub> )                                                                                                                                         | 12       | >99                                 | 450                                      | 180                                         | 1.30      |
| 2     | Poly(MA <sub>3</sub> -MA <sub>3</sub> )                                                                                                                        | 12       | >99                                 | 710                                      | 610                                         | 1.23      |
| 3     | Poly(MA <sub>3</sub> -MA <sub>3</sub> -MA <sub>3</sub> )                                                                                                       | 12       | 97                                  | 970                                      | 1200                                        | 1.16      |
| 4     | Poly(MA <sub>3</sub> -MA <sub>3</sub> -MA <sub>3</sub> -MA <sub>3</sub> )                                                                                      | 15       | 96                                  | 1230                                     | 1800                                        | 1.16      |
| 5     | Poly(MA <sub>3</sub> -MA <sub>3</sub> -MA <sub>3</sub> -MA <sub>3</sub> -MA <sub>3</sub> )                                                                     | 12       | 95                                  | 1500                                     | 2800                                        | 1.09      |
| 6     | Poly(MA <sub>3</sub> -MA <sub>3</sub> -MA <sub>3</sub> -MA <sub>3</sub> -MA <sub>3</sub> -MA <sub>3</sub> )                                                    | 13       | 99                                  | 1750                                     | 4000                                        | 1.08      |
| 7     | Poly(MA <sub>3</sub> -MA <sub>3</sub> -MA <sub>3</sub> -MA <sub>3</sub> -MA <sub>3</sub> -MA <sub>3</sub> -MA <sub>3</sub> )                                   | 16       | 97                                  | 2010                                     | 6900                                        | 1.08      |
| 8     | Poly(MA <sub>3</sub> -MA <sub>3</sub> )                  | 24       | 96                                  | 2270                                     | 7900                                        | 1.09      |
| 9     | Poly(MA <sub>3</sub> -MA <sub>3</sub> ) | 48       | 50                                  | 2530                                     | 8400                                        | 1.09      |

<sup>a</sup>Determined by <sup>1</sup>H NMR. <sup>b</sup>Determined by CHCl<sub>3</sub> SEC analysis.

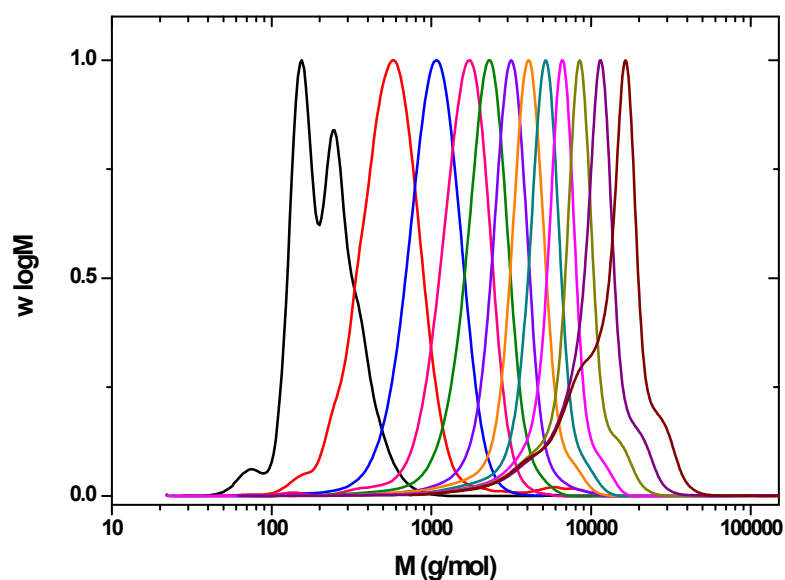

**Figure S5a:** Molecular weight distributions for successive cycles during synthesis of dodecablock homopolymer **DP=3** in DMSO at ambient temperature. A fresh solution of  $[\text{CuBr}_2]:[\text{Me}_6\text{-Tren}] = [0.02]:[0.12]$ , was added together with the monomer upon every 3<sup>rd</sup> addition.

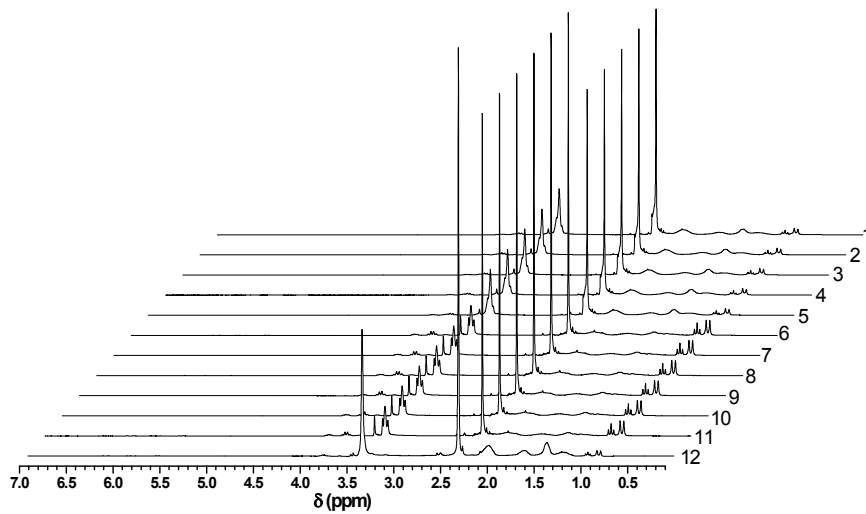

**Figure S5b:**  $^1\text{H}$  NMR spectra showing the monomer conversion for each cycle.

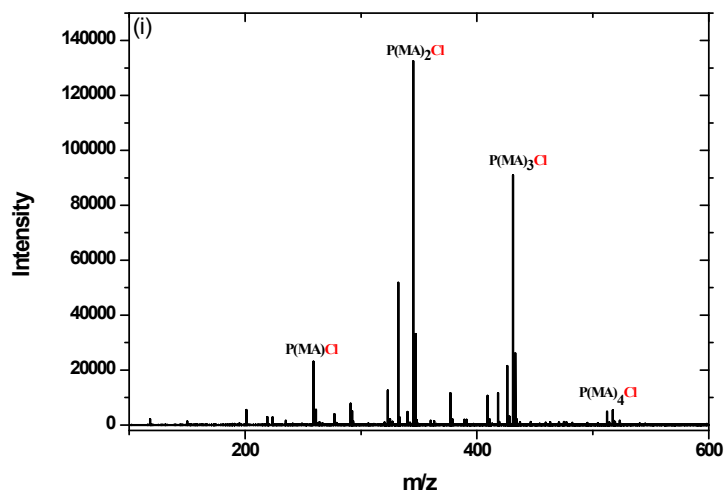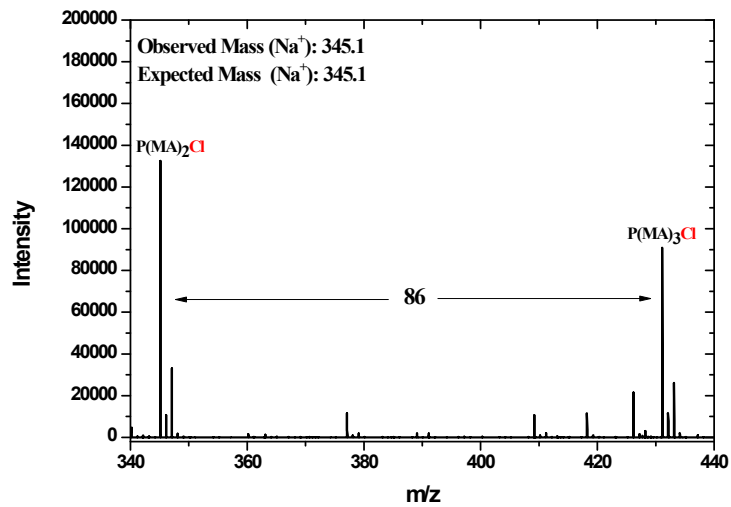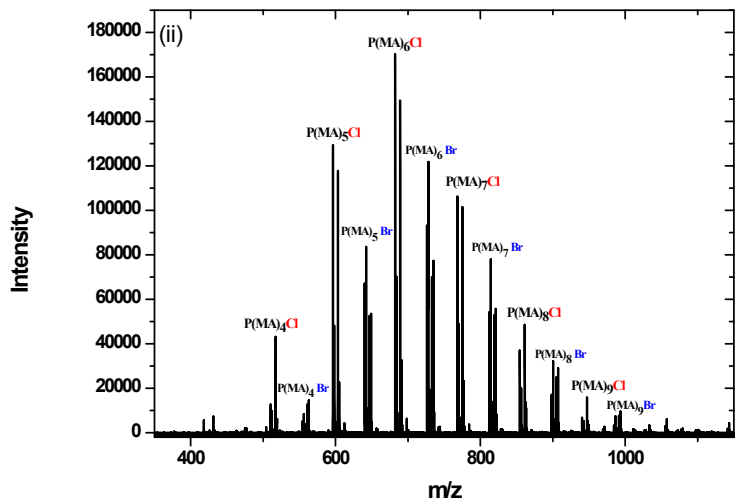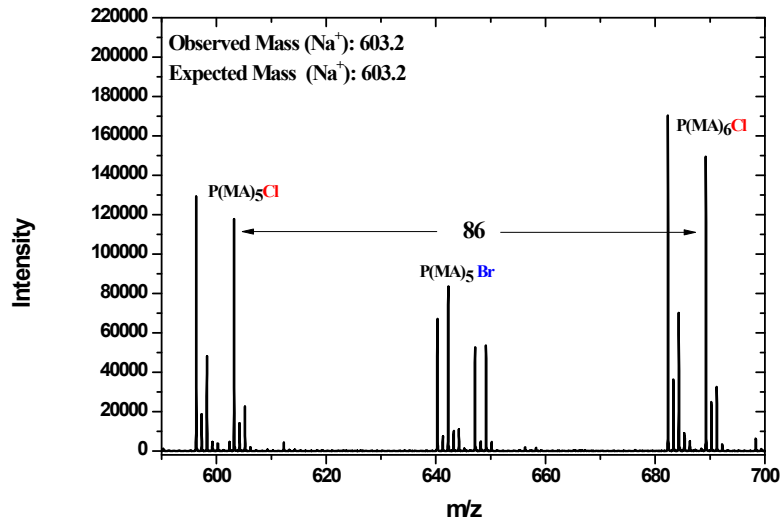



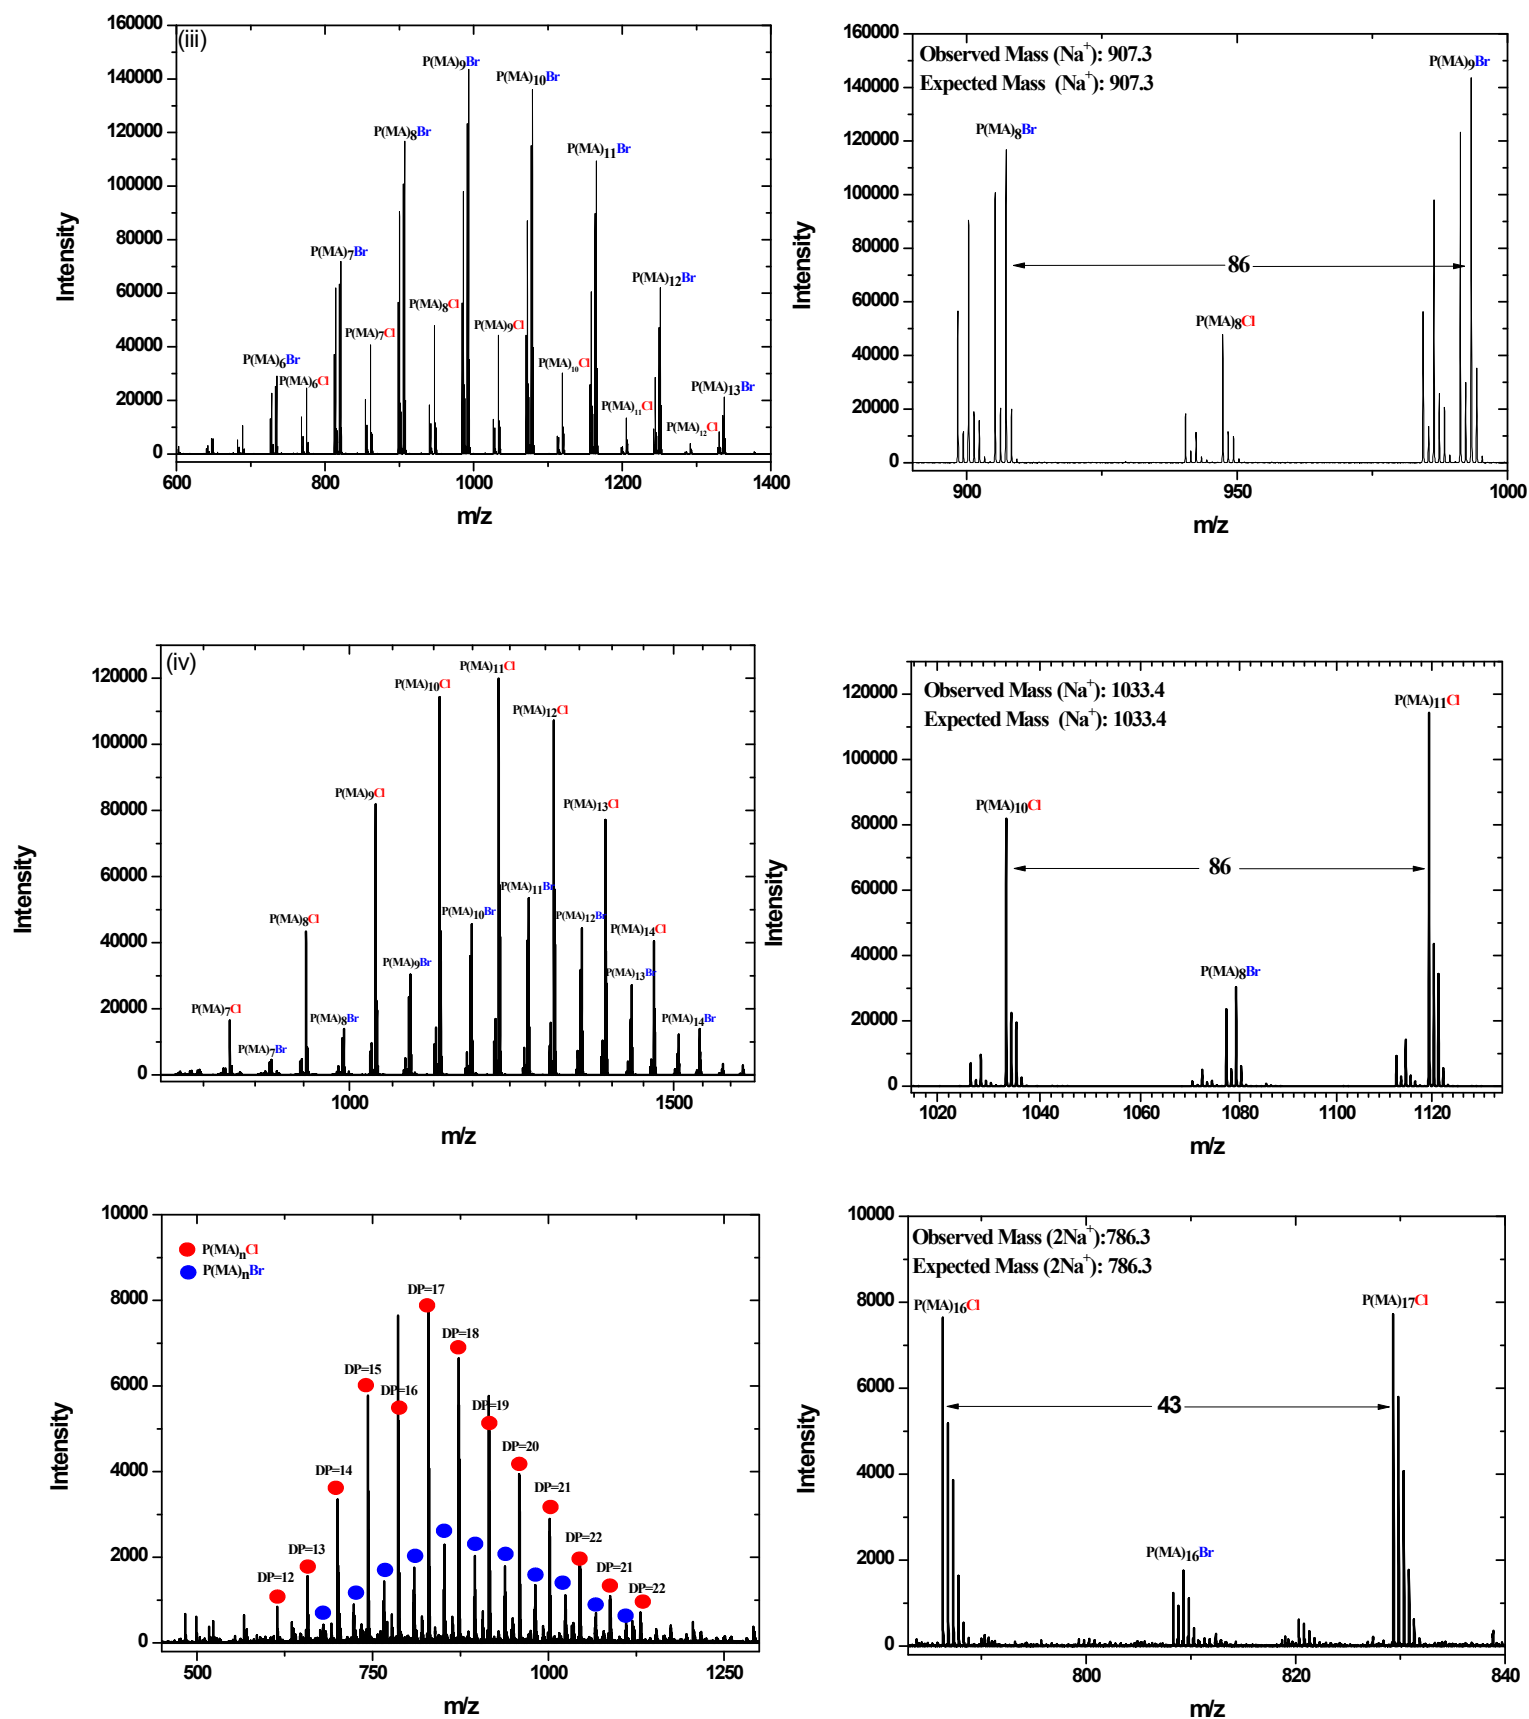

**Figure S5c:** ESI-MS spectra of the (i) 1<sup>st</sup> block, (ii) 2<sup>nd</sup> block, (iii) 3<sup>rd</sup> block, (iv) 4<sup>th</sup> block and (v) 5<sup>th</sup> block (doubly charged) obtained during the synthesis of dodecablock homopolymer DP=3 in DMSO, including the enlargement of the corresponding spectrum.

**Table S4:** Characterization data for the synthesis of the dodecablock homopolymer obtained from UV experiment. Initial feed ratio = [MA]:[EBiB]:[CuBr<sub>2</sub>]:[Me<sub>6</sub>-Tren] = [3]:[1]:[0.02]:[0.12] in DMSO at ambient temperature.

| Cycle | Multiblock copolymer composition                                                                                                                                                                                  | Time (h) | Monomer conversion <sup>a</sup> (%) | M <sub>n,th</sub> [g mol <sup>-1</sup> ] | M <sub>n,GPC</sub> <sup>b</sup> [g mol <sup>-1</sup> ] | <i>D</i> |
|-------|-------------------------------------------------------------------------------------------------------------------------------------------------------------------------------------------------------------------|----------|-------------------------------------|------------------------------------------|--------------------------------------------------------|----------|
| 1     | Poly(MA <sub>3</sub> )                                                                                                                                                                                            | 12       | >99                                 | 450                                      | 190                                                    | 1.23     |
| 2     | Poly(MA <sub>3</sub> -MA <sub>3</sub> )                                                                                                                                                                           | 12       | >99                                 | 710                                      | 480                                                    | 1.24     |
| 3     | Poly(MA <sub>3</sub> -MA <sub>3</sub> -MA <sub>3</sub> )                                                                                                                                                          | 12       | 99                                  | 970                                      | 920                                                    | 1.19     |
| 4     | Poly(MA <sub>3</sub> -MA <sub>3</sub> -MA <sub>3</sub> -MA <sub>3</sub> )                                                                                                                                         | 12       | >99                                 | 1230                                     | 1400                                                   | 1.16     |
| 5     | Poly(MA <sub>3</sub> -MA <sub>3</sub> -MA <sub>3</sub> -MA <sub>3</sub> -MA <sub>3</sub> )                                                                                                                        | 12       | 98                                  | 1500                                     | 1900                                                   | 1.15     |
| 6     | Poly(MA <sub>3</sub> -MA <sub>3</sub> -MA <sub>3</sub> -MA <sub>3</sub> -MA <sub>3</sub> -MA <sub>3</sub> )                                                                                                       | 12       | 99                                  | 1750                                     | 2800                                                   | 1.13     |
| 7     | Poly(MA <sub>3</sub> -MA <sub>3</sub> -MA <sub>3</sub> -MA <sub>3</sub> -MA <sub>3</sub> -MA <sub>3</sub> -MA <sub>3</sub> )                                                                                      | 12       | 99                                  | 2010                                     | 3600                                                   | 1.13     |
| 8     | Poly(MA <sub>3</sub> -MA <sub>3</sub> )                                                                     | 14       | 97                                  | 2270                                     | 4600                                                   | 1.12     |
| 9     | Poly(MA <sub>3</sub> -MA <sub>3</sub> )                                                    | 16       | 99                                  | 2530                                     | 5700                                                   | 1.10     |
| 10    | Poly(MA <sub>3</sub> -MA <sub>3</sub> )                                   | 17       | 98                                  | 2790                                     | 7100                                                   | 1.19     |
| 11    | Poly(MA <sub>3</sub> -MA <sub>3</sub> )                  | 24       | 98                                  | 3050                                     | 9000                                                   | 1.20     |
| 12    | Poly(MA <sub>3</sub> -MA <sub>3</sub> ) | 30       | 95                                  | 3310                                     | 11800                                                  | 1.30     |

<sup>a</sup>Determined by <sup>1</sup>H NMR. <sup>b</sup>Determined by CHCl<sub>3</sub> SEC analysis.

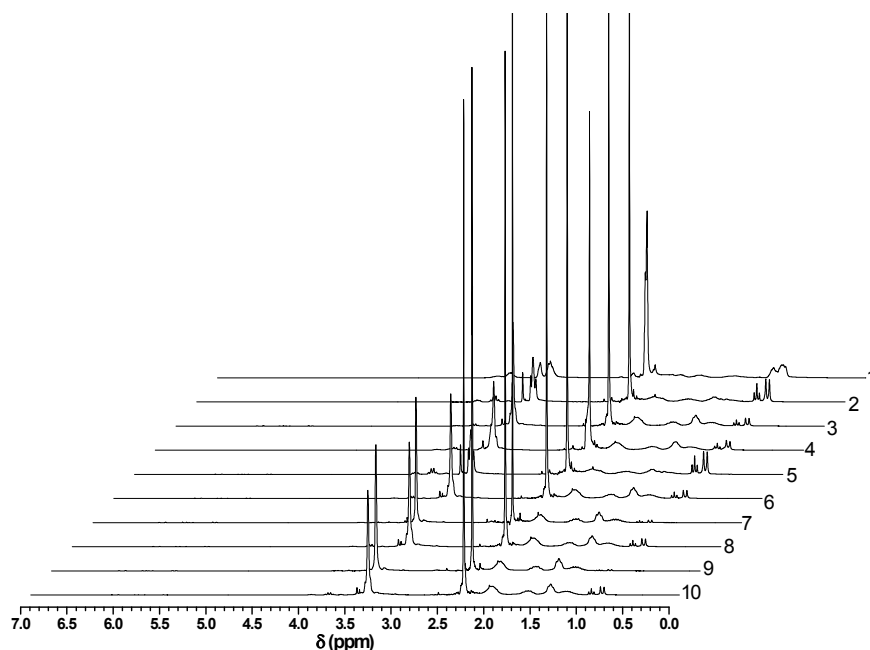

**Figure S6:**  $^1\text{H}$  NMR spectra showing the monomer conversion for each cycle during synthesis of decablock homopolymer  $\text{DP}=3$  in DMSO at ambient temperature. A fresh solution of  $[\text{CuBr}_2]:[\text{Me}_6\text{-Tren}] = [\mathbf{0.02}]:[\mathbf{0.12}]$ , was added together with the monomer upon every 2<sup>nd</sup> addition.

**Table S5:** Characterization data for the synthesis of the decablock homopolymer obtained from UV experiment. Initial feed ratio =  $[\text{MA}]:[\text{EBiB}]:[\text{CuBr}_2]:[\text{Me}_6\text{-Tren}] = [\mathbf{3}]:[\mathbf{1}]:[\mathbf{0.02}]:[\mathbf{0.12}]$  in DMSO at ambient temperature.

| Cycle | Multiblock copolymer composition                                                                                                  | Time (h) | Monomer conversion <sup>a</sup> (%) | $M_{n,\text{th}}$ [ $\text{g mol}^{-1}$ ] | $M_{n,\text{GPC}}$ <sup>b</sup> [ $\text{g mol}^{-1}$ ] | $\bar{D}$ |
|-------|-----------------------------------------------------------------------------------------------------------------------------------|----------|-------------------------------------|-------------------------------------------|---------------------------------------------------------|-----------|
| 1     | Poly( $\text{MA}_3$ )                                                                                                             | 12       | 100                                 | 450                                       | 180                                                     | 1.26      |
| 2     | Poly( $\text{MA}_3\text{-MA}_3$ )                                                                                                 | 12       | 99                                  | 710                                       | 490                                                     | 1.23      |
| 3     | Poly( $\text{MA}_3\text{-MA}_3\text{-MA}_3$ )                                                                                     | 12       | 100                                 | 970                                       | 1000                                                    | 1.18      |
| 4     | Poly( $\text{MA}_3\text{-MA}_3\text{-MA}_3\text{-MA}_3$ )                                                                         | 12       | 99                                  | 1230                                      | 1500                                                    | 1.16      |
| 5     | Poly( $\text{MA}_3\text{-MA}_3\text{-MA}_3\text{-MA}_3\text{-MA}_3$ )                                                             | 12       | 99                                  | 1500                                      | 2000                                                    | 1.20      |
| 6     | Poly( $\text{MA}_3\text{-MA}_3\text{-MA}_3\text{-MA}_3\text{-MA}_3\text{-MA}_3$ )                                                 | 12       | 97                                  | 1750                                      | 2800                                                    | 1.22      |
| 7     | Poly( $\text{MA}_3\text{-MA}_3\text{-MA}_3\text{-MA}_3\text{-MA}_3\text{-MA}_3\text{-MA}_3$ )                                     | 12       | 96                                  | 2010                                      | 4000                                                    | 1.18      |
| 8     | Poly( $\text{MA}_3\text{-MA}_3\text{-MA}_3\text{-MA}_3\text{-MA}_3\text{-MA}_3\text{-MA}_3\text{-MA}_3$ )                         | 12       | 96                                  | 2270                                      | 4900                                                    | 1.23      |
| 9     | Poly( $\text{MA}_3\text{-MA}_3\text{-MA}_3\text{-MA}_3\text{-MA}_3\text{-MA}_3\text{-MA}_3\text{-MA}_3\text{-MA}_3$ )             | 14       | 95                                  | 2530                                      | 5900                                                    | 1.32      |
| 10    | Poly( $\text{MA}_3\text{-MA}_3\text{-MA}_3\text{-MA}_3\text{-MA}_3\text{-MA}_3\text{-MA}_3\text{-MA}_3\text{-MA}_3\text{-MA}_3$ ) | 24       | 89                                  | 2790                                      | 6200                                                    | 1.59      |

<sup>a</sup>Determined by  $^1\text{H}$  NMR. <sup>b</sup>Determined by  $\text{CHCl}_3$  SEC analysis.

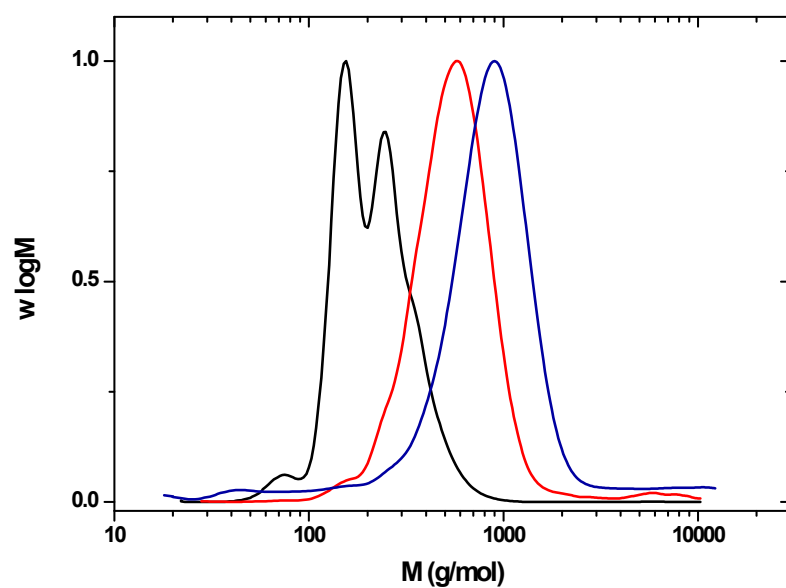

**Figure S7a:** Molecular weight distributions for successive cycles during synthesis of triblock homopolymer **DP=3** in DMSO at ambient temperature. A fresh solution of  $[\text{CuBr}_2] = [0.02]$  was added together with the monomer upon every 2<sup>nd</sup> addition.

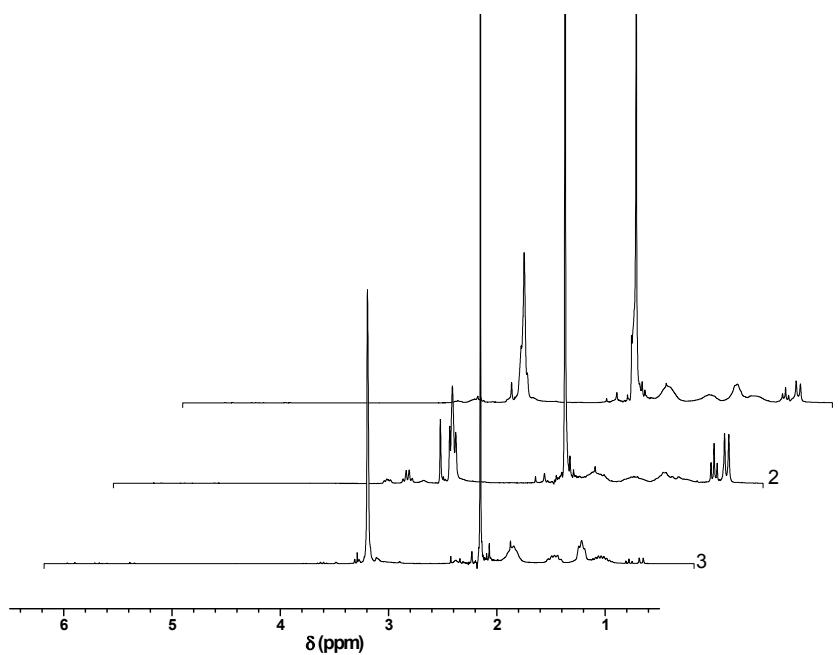

**Figure S7b:**  $^1\text{H}$  NMR spectra showing the monomer conversion for each cycle.

**Table S6:** Characterization data for the synthesis of the triblock homopolymer obtained from UV experiment. Initial feed ratio = [MA]:[EBiB]:[CuBr<sub>2</sub>]:[Me<sub>6</sub>-Tren] = [3]:[1]:[0.02]:[0.12] in DMSO at ambient temperature.

| Cycle | Multiblock copolymer composition                         | Time (h) | Monomer conversion <sup>a</sup> (%) | M <sub>n,th</sub> [g mol <sup>-1</sup> ] | M <sub>n,GPC</sub> <sup>b</sup> [g mol <sup>-1</sup> ] | <i>D</i> |
|-------|----------------------------------------------------------|----------|-------------------------------------|------------------------------------------|--------------------------------------------------------|----------|
| 1     | Poly(MA <sub>3</sub> )                                   | 12       | 99                                  | 450                                      | 200                                                    | 1.23     |
| 2     | Poly(MA <sub>3</sub> -MA <sub>3</sub> )                  | 12       | 99                                  | 710                                      | 500                                                    | 1.24     |
| 3     | Poly(MA <sub>3</sub> -MA <sub>3</sub> -MA <sub>3</sub> ) | 15       | 97                                  | 970                                      | 700                                                    | 1.23     |

<sup>a</sup>Determined by <sup>1</sup>H NMR. <sup>b</sup>Determined by CHCl<sub>3</sub> SEC analysis.

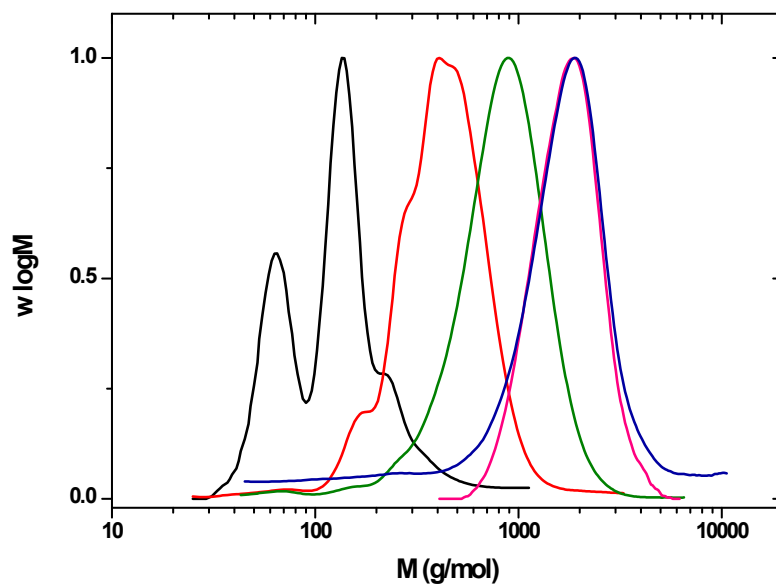

**Figure S8a:** Molecular weight distributions for successive cycles during synthesis of pentablock homopolymer DP=3 in DMSO at ambient temperature. A fresh solution of [Me<sub>6</sub>-Tren] = [0.12], was added together with the monomer upon every 2<sup>nd</sup> addition.

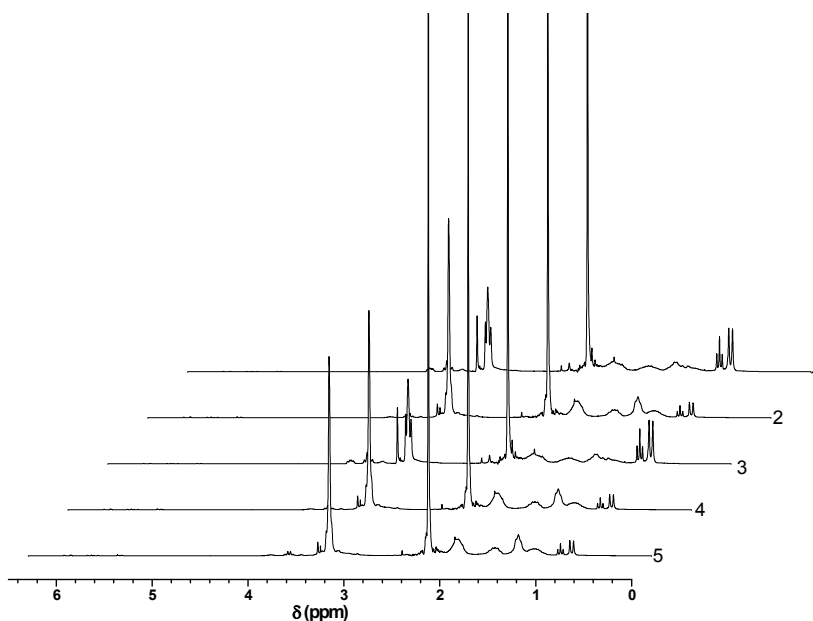

**Figure S8b:**  $^1\text{H}$  NMR spectra showing the monomer conversion for each cycle.

**Table S7:** Characterization data for the synthesis of the pentablock homopolymer obtained from UV experiment. Initial feed ratio =  $[\text{MA}]:[\text{EBiB}]:[\text{CuBr}_2]:[\text{Me}_6\text{-Tren}] = [3]:[1]:[0.02]:[0.12]$  in DMSO at ambient temperature.

| Cycle | Multiblock copolymer composition                                                           | Time (h) | Monomer conversion <sup>a</sup> (%) | $M_{n,\text{th}}$ [g mol <sup>-1</sup> ] | $M_{n,\text{GPC}}$ <sup>b</sup> [g mol <sup>-1</sup> ] | $\bar{D}$ |
|-------|--------------------------------------------------------------------------------------------|----------|-------------------------------------|------------------------------------------|--------------------------------------------------------|-----------|
| 1     | Poly(MA <sub>3</sub> )                                                                     | 12       | 99                                  | 450                                      | 105                                                    | 1.45      |
| 2     | Poly(MA <sub>3</sub> -MA <sub>3</sub> )                                                    | 12       | 99                                  | 710                                      | 355                                                    | 1.34      |
| 3     | Poly(MA <sub>3</sub> -MA <sub>3</sub> -MA <sub>3</sub> )                                   | 12       | 99                                  | 970                                      | 680                                                    | 1.25      |
| 4     | Poly(MA <sub>3</sub> -MA <sub>3</sub> -MA <sub>3</sub> -MA <sub>3</sub> )                  | 12       | 99                                  | 1230                                     | 1500                                                   | 1.15      |
| 5     | Poly(MA <sub>3</sub> -MA <sub>3</sub> -MA <sub>3</sub> -MA <sub>3</sub> -MA <sub>3</sub> ) | 12       | 100                                 | 1500                                     | 1560                                                   | 1.35      |

<sup>a</sup>Determined by  $^1\text{H}$  NMR. <sup>b</sup>Determined by  $\text{CHCl}_3$  SEC analysis.

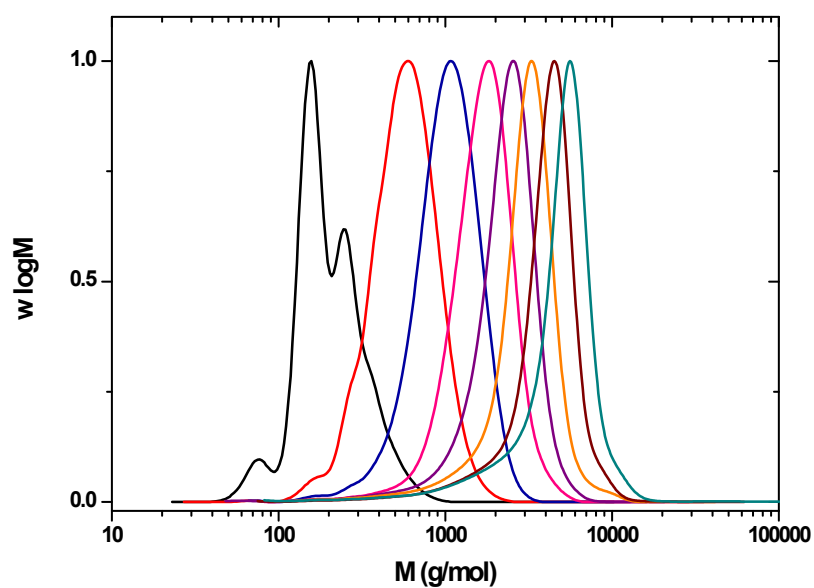

**Figure S9a:** Molecular weight distributions for successive cycles during synthesis of octablock homopolymer  $DP=3$  in DMSO at ambient temperature. A fresh solution of  $[CuBr_2]:[Me_6-Tren] = [0.01]:[0.12]$ , was added together with the monomer upon every 3<sup>rd</sup> addition.

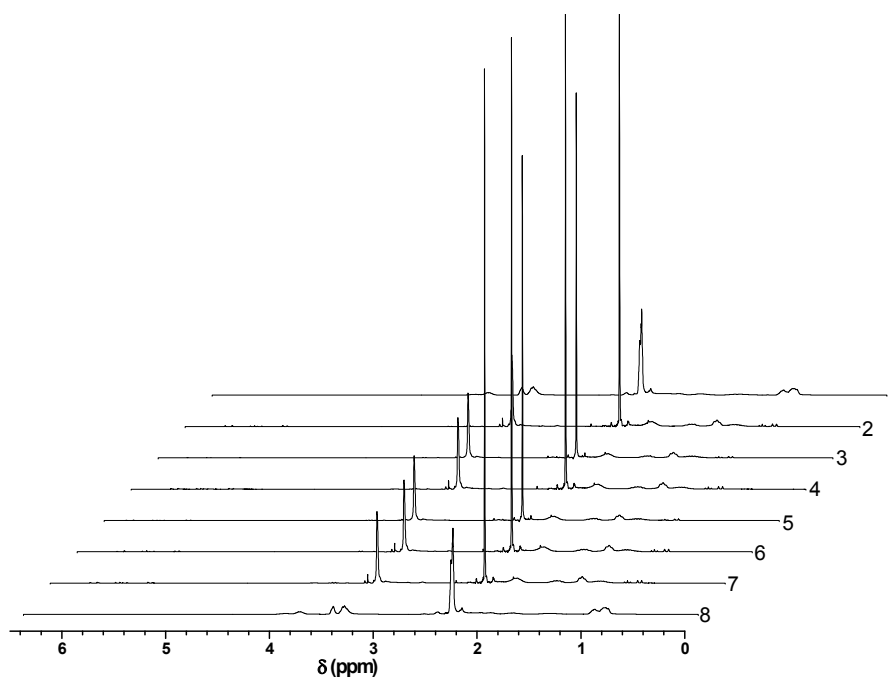

**Figure S9b:**  $^1H$  NMR spectra showing the monomer conversion for each cycle.

**Table S8:** Characterization data for the synthesis of the octablock homopolymer obtained from UV experiment. Initial feed ratio = [MA]:[EBiB]:[CuBr<sub>2</sub>]:[Me<sub>6</sub>-Tren] = [3]:[1]:[0.01]:[0.12] in DMSO at ambient temperature.

| Cycle | Multiblock copolymer composition                                                                                                              | Time (h) | Monomer conversion <sup>a</sup> (%) | M <sub>n,th</sub> [g mol <sup>-1</sup> ] | M <sub>n,GPC</sub> <sup>b</sup> [g mol <sup>-1</sup> ] | Đ    |
|-------|-----------------------------------------------------------------------------------------------------------------------------------------------|----------|-------------------------------------|------------------------------------------|--------------------------------------------------------|------|
| 1     | Poly(MA <sub>3</sub> )                                                                                                                        | 12       | 100                                 | 450                                      | 200                                                    | 1.25 |
| 2     | Poly(MA <sub>3</sub> -MA <sub>3</sub> )                                                                                                       | 12       | 99                                  | 710                                      | 500                                                    | 1.24 |
| 3     | Poly(MA <sub>3</sub> -MA <sub>3</sub> -MA <sub>3</sub> )                                                                                      | 12       | 100                                 | 970                                      | 900                                                    | 1.23 |
| 4     | Poly(MA <sub>3</sub> -MA <sub>3</sub> -MA <sub>3</sub> -MA <sub>3</sub> )                                                                     | 12       | 99                                  | 1230                                     | 1500                                                   | 1.21 |
| 5     | Poly(MA <sub>3</sub> -MA <sub>3</sub> -MA <sub>3</sub> -MA <sub>3</sub> -MA <sub>3</sub> )                                                    | 12       | 100                                 | 1500                                     | 2000                                                   | 1.23 |
| 6     | Poly(MA <sub>3</sub> -MA <sub>3</sub> -MA <sub>3</sub> -MA <sub>3</sub> -MA <sub>3</sub> -MA <sub>3</sub> )                                   | 12       | 99                                  | 1750                                     | 2500                                                   | 1.29 |
| 7     | Poly(MA <sub>3</sub> -MA <sub>3</sub> -MA <sub>3</sub> -MA <sub>3</sub> -MA <sub>3</sub> -MA <sub>3</sub> -MA <sub>3</sub> )                  | 13       | 98                                  | 2010                                     | 3500                                                   | 1.22 |
| 8     | Poly(MA <sub>3</sub> -MA <sub>3</sub> ) | 15       | 95                                  | 2270                                     | 3800                                                   | 1.37 |

<sup>a</sup>Determined by <sup>1</sup>H NMR. <sup>b</sup>Determined by CHCl<sub>3</sub> SEC analysis.

**Scheme S2:** Synthesis of multiblock copolymers DP=3 by sequential addition of monomers without intermediate purification.

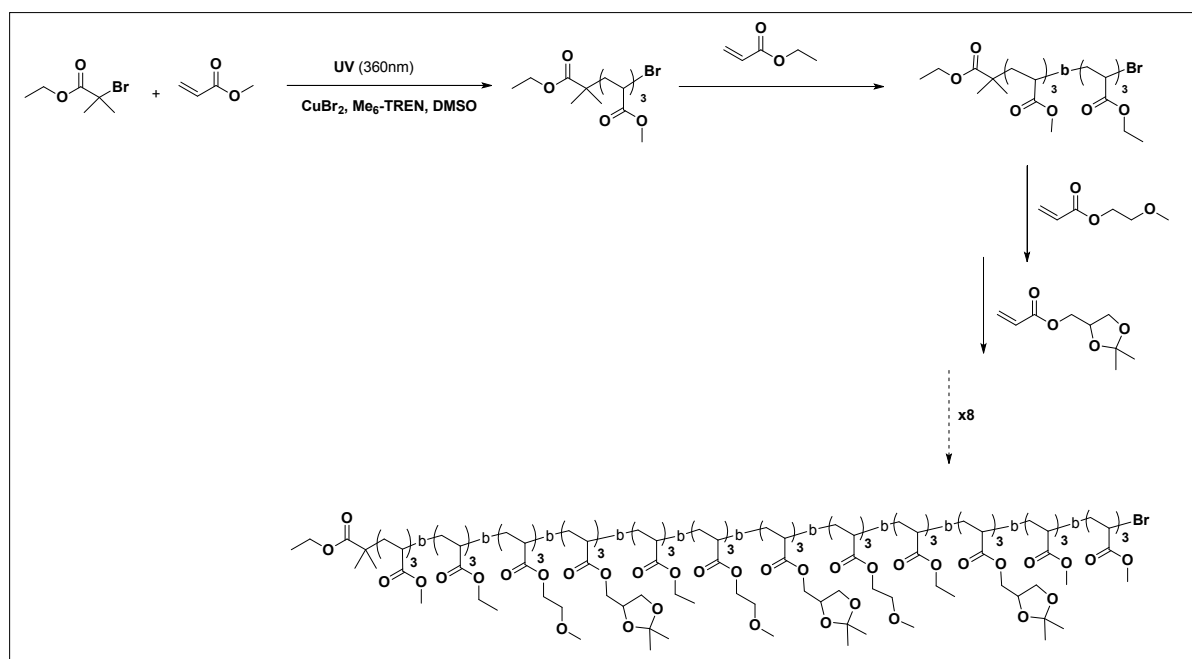



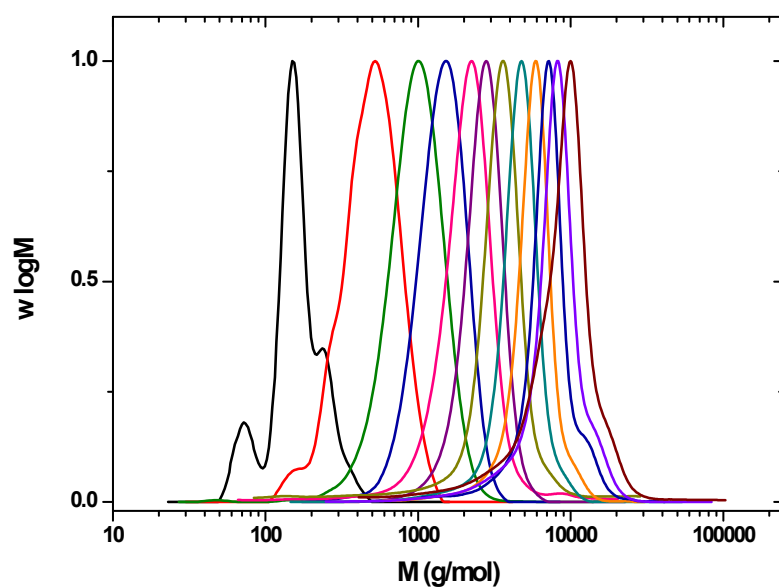

**Figure S10a:** Molecular weight distributions for successive cycles during synthesis of dodecablock copolymer  $DP=3$  in DMSO at ambient temperature. A fresh solution of  $[CuBr_2]:[Me_6-Tren] = [0.02]:[0.12]$ , was added together with the monomer upon every 3<sup>rd</sup> addition.

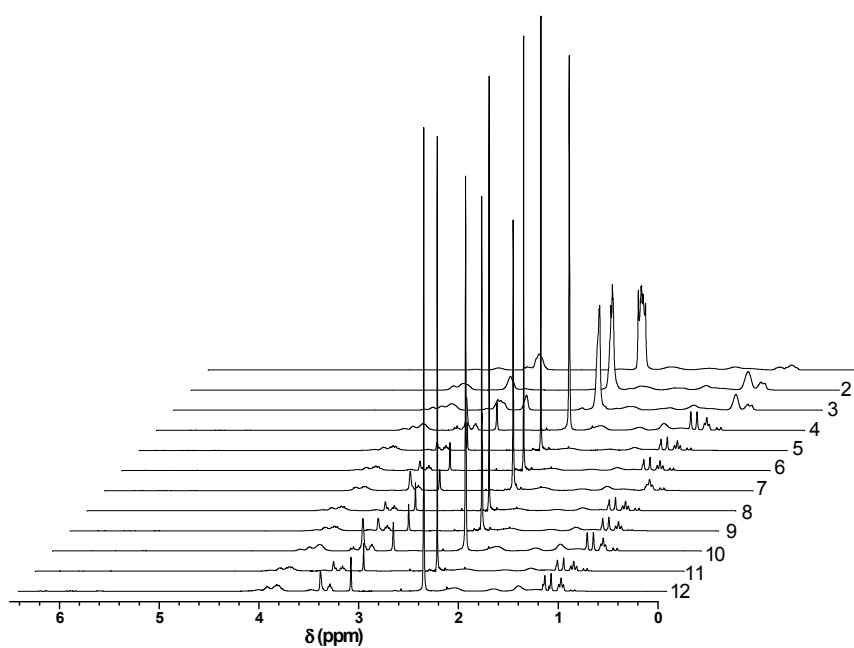

**Figure S10b:**  $^1H$  NMR spectra showing the monomer conversion for each cycle.

**Table S9:** Characterization data for the synthesis of the dodecablock copolymer obtained from UV experiment. Initial feed ratio = [MA]:[EBiB]:[CuBr<sub>2</sub>]:[Me<sub>6</sub>-Tren] = [3]:[1]:[0.02]:[0.12] in DMSO at ambient temperature.

| Cycle | Multiblock copolymer composition                                                                                                                                                                                      | Time (h) | Monomer conversion <sup>a</sup> (%) | M <sub>n,th</sub> [g mol <sup>-1</sup> ] | M <sub>n,GPC</sub> <sup>b</sup> [g mol <sup>-1</sup> ] | <i>D</i> |
|-------|-----------------------------------------------------------------------------------------------------------------------------------------------------------------------------------------------------------------------|----------|-------------------------------------|------------------------------------------|--------------------------------------------------------|----------|
| 1     | Poly(MA <sub>3</sub> )                                                                                                                                                                                                | 12       | 99                                  | 450                                      | 144                                                    | 1.17     |
| 2     | Poly(MA <sub>3</sub> -EA <sub>3</sub> )                                                                                                                                                                               | 12       | 99                                  | 760                                      | 430                                                    | 1.21     |
| 3     | Poly(MA <sub>3</sub> -EA <sub>3</sub> -EGA <sub>3</sub> )                                                                                                                                                             | 12       | 98                                  | 1150                                     | 800                                                    | 1.20     |
| 4     | Poly(MA <sub>3</sub> -EA <sub>3</sub> -EGA <sub>3</sub> -SA <sub>3</sub> )                                                                                                                                            | 12       | 99                                  | 1700                                     | 1300                                                   | 1.14     |
| 5     | Poly(MA <sub>3</sub> -EA <sub>3</sub> -EGA <sub>3</sub> -SA <sub>3</sub> -EA <sub>3</sub> )                                                                                                                           | 12       | 98                                  | 2000                                     | 1800                                                   | 1.15     |
| 6     | Poly(MA <sub>3</sub> -EA <sub>3</sub> -EGA <sub>3</sub> -SA <sub>3</sub> -EA <sub>3</sub> -EGA <sub>3</sub> )                                                                                                         | 12       | 96                                  | 2400                                     | 2480                                                   | 1.11     |
| 7     | Poly(MA <sub>3</sub> -EA <sub>3</sub> -EGA <sub>3</sub> -SA <sub>3</sub> -EA <sub>3</sub> -EGA <sub>3</sub> -SA <sub>3</sub> )                                                                                        | 12       | 96                                  | 3000                                     | 3200                                                   | 1.13     |
| 8     | Poly(MA <sub>3</sub> -EA <sub>3</sub> -EGA <sub>3</sub> -SA <sub>3</sub> -EA <sub>3</sub> -EGA <sub>3</sub> -SA <sub>3</sub> -EGA <sub>3</sub> )                                                                      | 12       | 96                                  | 3400                                     | 4200                                                   | 1.12     |
| 9     | Poly(MA <sub>3</sub> -EA <sub>3</sub> -EGA <sub>3</sub> -SA <sub>3</sub> -EA <sub>3</sub> -EGA <sub>3</sub> -SA <sub>3</sub> -EGA <sub>3</sub> -EA <sub>3</sub> )                                                     | 15       | 97                                  | 3600                                     | 5400                                                   | 1.11     |
| 10    | Poly(MA <sub>3</sub> -EA <sub>3</sub> -EGA <sub>3</sub> -SA <sub>3</sub> -EA <sub>3</sub> -EGA <sub>3</sub> -SA <sub>3</sub> -EGA <sub>3</sub> -EA <sub>3</sub> -SA <sub>3</sub> )                                    | 19       | 99                                  | 4200                                     | 6600                                                   | 1.12     |
| 11    | Poly(MA <sub>3</sub> -EA <sub>3</sub> -EGA <sub>3</sub> -SA <sub>3</sub> -EA <sub>3</sub> -EGA <sub>3</sub> -SA <sub>3</sub> -EGA <sub>3</sub> -EA <sub>3</sub> -SA <sub>3</sub> -MA <sub>3</sub> )                   | 24       | 99                                  | 4500                                     | 7000                                                   | 1.19     |
| 12    | Poly(MA <sub>3</sub> -EA <sub>3</sub> -EGA <sub>3</sub> -SA <sub>3</sub> -EA <sub>3</sub> -EGA <sub>3</sub> -SA <sub>3</sub> -EGA <sub>3</sub> -EA <sub>3</sub> -SA <sub>3</sub> -MA <sub>3</sub> -EGA <sub>3</sub> ) | 48       | 92                                  | 4900                                     | 10000                                                  | 1.39     |

<sup>a</sup>Determined by <sup>1</sup>H NMR. <sup>b</sup>Determined by CHCl<sub>3</sub> SEC analysis.

## DP=10

**Scheme S3:** Synthesis of **multiblock copolymers DP=10** by sequential addition of monomers without intermediate purification.

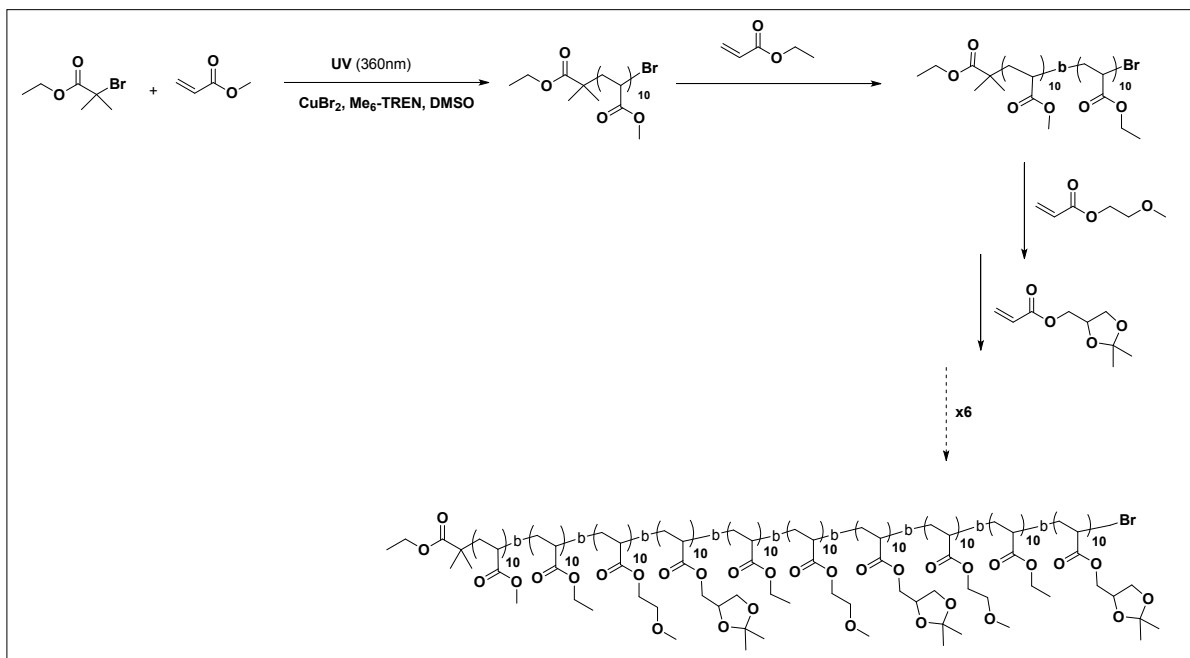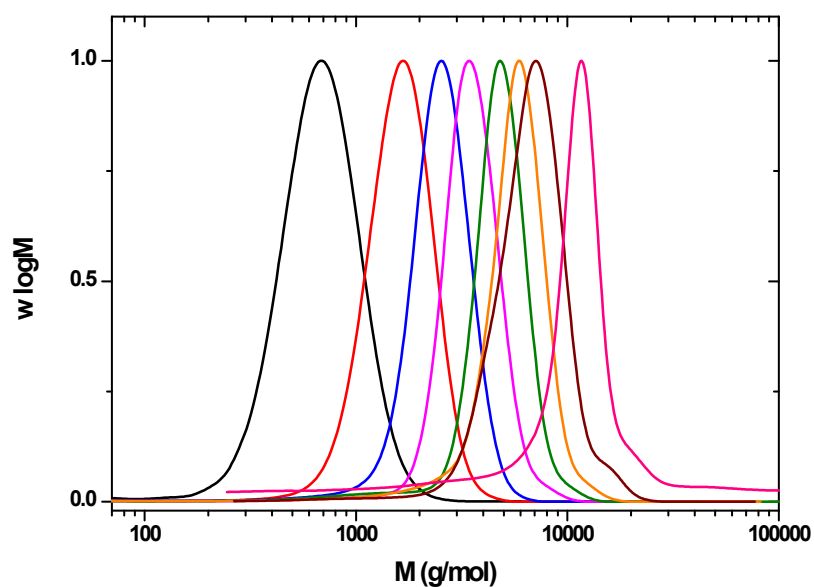

**Figure S11a:** Molecular weight distributions for successive cycles during synthesis of octablock copolymer **DP=10** in DMSO at ambient temperature. A fresh solution of [CuBr<sub>2</sub>]:[Me<sub>6</sub>-Tren] = [0.02]:[0.12], was added together with the monomer upon every 3<sup>rd</sup> addition.

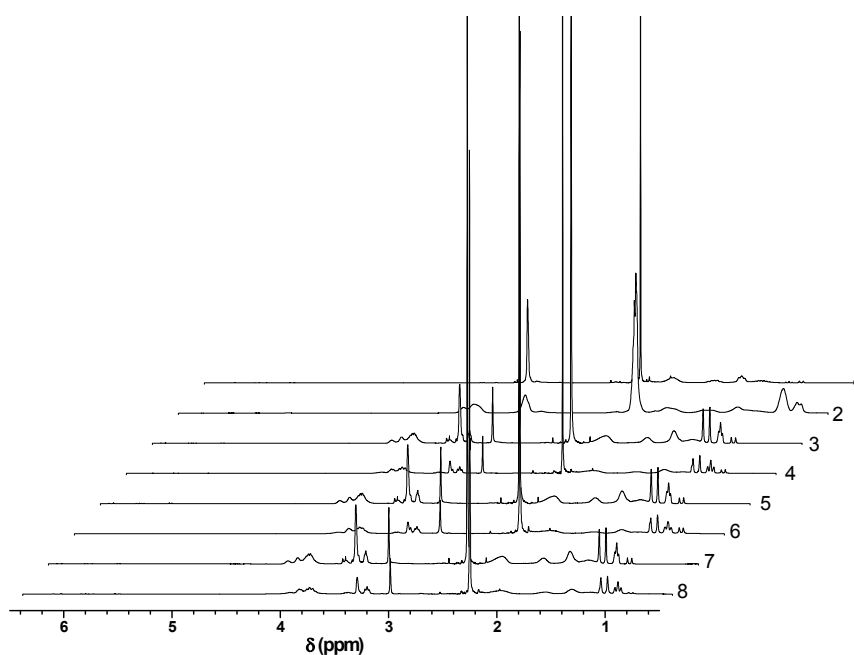

**Figure S11b:**  $^1\text{H}$  NMR spectra showing the monomer conversion for each cycle.

**Table S10:** Characterization data for the synthesis of the octablock copolymer obtained from UV experiment. Initial feed ratio =  $[\text{MA}]:[\text{EBiB}]:[\text{CuBr}_2]:[\text{Me}_6\text{-Tren}] = [10]:[1]:[0.02]:[0.12]$  in DMSO at ambient temperature.

| Cycle | Multiblock copolymer composition                                                                                                     | Time (h) | Monomer conversion <sup>a</sup> (%) | $M_{n,\text{th}}$ [ $\text{g mol}^{-1}$ ] | $M_{n,\text{GPC}}$ <sup>b</sup> [ $\text{g mol}^{-1}$ ] | $\bar{D}$ |
|-------|--------------------------------------------------------------------------------------------------------------------------------------|----------|-------------------------------------|-------------------------------------------|---------------------------------------------------------|-----------|
| 1     | Poly( $\text{MA}_{10}$ )                                                                                                             | 2        | 99                                  | 1060                                      | 600                                                     | 1.24      |
| 2     | Poly( $\text{MA}_{10}\text{-EA}_{10}$ )                                                                                              | 6        | 99                                  | 2100                                      | 1500                                                    | 1.15      |
| 3     | Poly( $\text{MA}_{10}\text{-EA}_{10}\text{-EGA}_{10}$ )                                                                              | 12       | 100                                 | 3400                                      | 2300                                                    | 1.15      |
| 4     | Poly( $\text{MA}_{10}\text{-EA}_{10}\text{-EGA}_{10}\text{-SA}_{10}$ )                                                               | 12       | 97                                  | 5200                                      | 3300                                                    | 1.12      |
| 5     | Poly( $\text{MA}_{10}\text{-EA}_{10}\text{-EGA}_{10}\text{-SA}_{10}\text{-EA}_{10}$ )                                                | 12       | 99                                  | 6200                                      | 4000                                                    | 1.19      |
| 6     | Poly( $\text{MA}_{10}\text{-EA}_{10}\text{-EGA}_{10}\text{-SA}_{10}\text{-EA}_{10}\text{-EGA}_{10}$ )                                | 14       | 99                                  | 7600                                      | 5000                                                    | 1.17      |
| 7     | Poly( $\text{MA}_{10}\text{-EA}_{10}\text{-EGA}_{10}\text{-SA}_{10}\text{-EA}_{10}\text{-EGA}_{10}\text{-SA}_{10}$ )                 | 16       | 98                                  | 9400                                      | 6000                                                    | 1.15      |
| 8     | Poly( $\text{MA}_{10}\text{-EA}_{10}\text{-EGA}_{10}\text{-SA}_{10}\text{-EA}_{10}\text{-EGA}_{10}\text{-SA}_{10}\text{-EGA}_{10}$ ) | 24       | 97                                  | 11200                                     | 8000                                                    | 1.35      |

<sup>a</sup>Determined by  $^1\text{H}$  NMR. <sup>b</sup>Determined by  $\text{CHCl}_3$  SEC analysis.

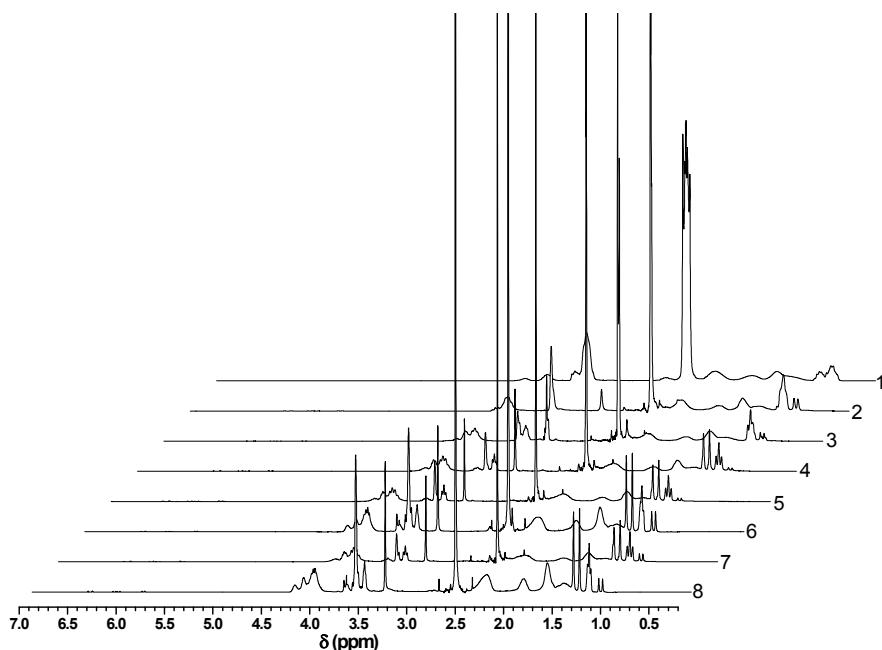

**Figure S12:**  $^1\text{H}$  NMR spectra showing the monomer conversion for each cycle during synthesis of octablock copolymer  $\text{DP}=10$  in DMSO at ambient temperature. A fresh solution of  $[\text{CuBr}_2]:[\text{Me}_6\text{-Tren}] = [\mathbf{0.02}]:[\mathbf{0.12}]$ , was added together with the monomer upon every 2<sup>nd</sup> addition.

**Table S11:** Characterization data for the synthesis of the octablock copolymer obtained from UV experiment. Initial feed ratio =  $[\text{MA}]:[\text{EBiB}]:[\text{CuBr}_2]:[\text{Me}_6\text{-Tren}] = [\mathbf{10}]:[\mathbf{1}]:[\mathbf{0.02}]:[\mathbf{0.12}]$  in DMSO at ambient temperature.

| Cycle | Multiblock copolymer composition                                                                                                     | Time (h) | Monomer conversion <sup>a</sup> (%) | $M_{n,\text{th}}$ [ $\text{g mol}^{-1}$ ] | $M_{n,\text{GPC}}^{\text{b}}$ [ $\text{g mol}^{-1}$ ] | $\bar{D}$ |
|-------|--------------------------------------------------------------------------------------------------------------------------------------|----------|-------------------------------------|-------------------------------------------|-------------------------------------------------------|-----------|
| 1     | Poly( $\text{MA}_{10}$ )                                                                                                             | 2        | 99                                  | 1060                                      | 880                                                   | 1.17      |
| 2     | Poly( $\text{MA}_{10}\text{-EA}_{10}$ )                                                                                              | 6        | 99                                  | 2100                                      | 2000                                                  | 1.12      |
| 3     | Poly( $\text{MA}_{10}\text{-EA}_{10}\text{-EGA}_{10}$ )                                                                              | 12       | 100                                 | 3400                                      | 3400                                                  | 1.09      |
| 4     | Poly( $\text{MA}_{10}\text{-EA}_{10}\text{-EGA}_{10}\text{-SA}_{10}$ )                                                               | 12       | 97                                  | 5200                                      | 4800                                                  | 1.07      |
| 5     | Poly( $\text{MA}_{10}\text{-EA}_{10}\text{-EGA}_{10}\text{-SA}_{10}\text{-EA}_{10}$ )                                                | 12       | 95                                  | 6200                                      | 6500                                                  | 1.08      |
| 6     | Poly( $\text{MA}_{10}\text{-EA}_{10}\text{-EGA}_{10}\text{-SA}_{10}\text{-EA}_{10}\text{-EGA}_{10}$ )                                | 14       | 99                                  | 7600                                      | 8400                                                  | 1.07      |
| 7     | Poly( $\text{MA}_{10}\text{-EA}_{10}\text{-EGA}_{10}\text{-SA}_{10}\text{-EA}_{10}\text{-EGA}_{10}\text{-SA}_{10}$ )                 | 16       | 98                                  | 9400                                      | 10200                                                 | 1.11      |
| 8     | Poly( $\text{MA}_{10}\text{-EA}_{10}\text{-EGA}_{10}\text{-SA}_{10}\text{-EA}_{10}\text{-EGA}_{10}\text{-SA}_{10}\text{-EGA}_{10}$ ) | 24       | 99                                  | 11200                                     | 12400                                                 | 1.10      |

<sup>a</sup>Determined by  $^1\text{H}$  NMR. <sup>b</sup>Determined by  $\text{CHCl}_3$  SEC analysis.

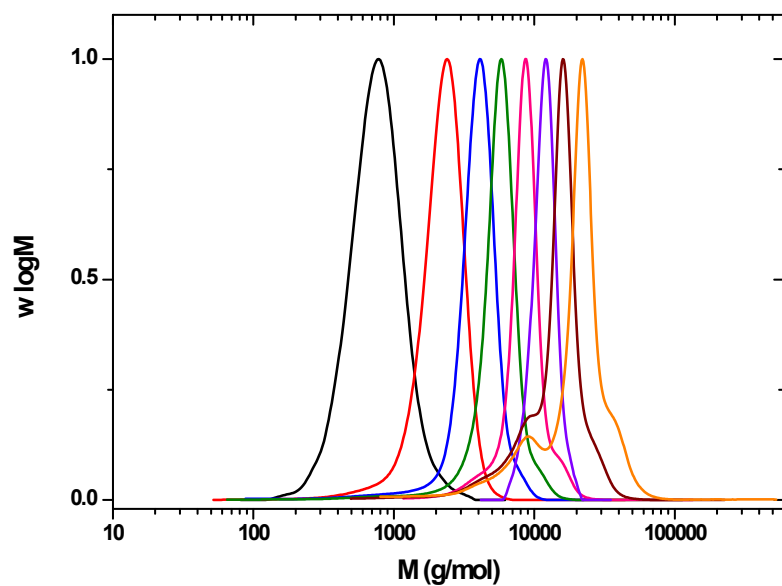

**Figure S13a:** Molecular weight distributions for successive cycles during synthesis of octablock copolymer DP=10 in DMSO at ambient temperature. A fresh solution of  $[\text{CuBr}_2]:[\text{Me}_6\text{-Tren}] = [0.02]:[0.12]$ , was added together with the monomer upon every addition.

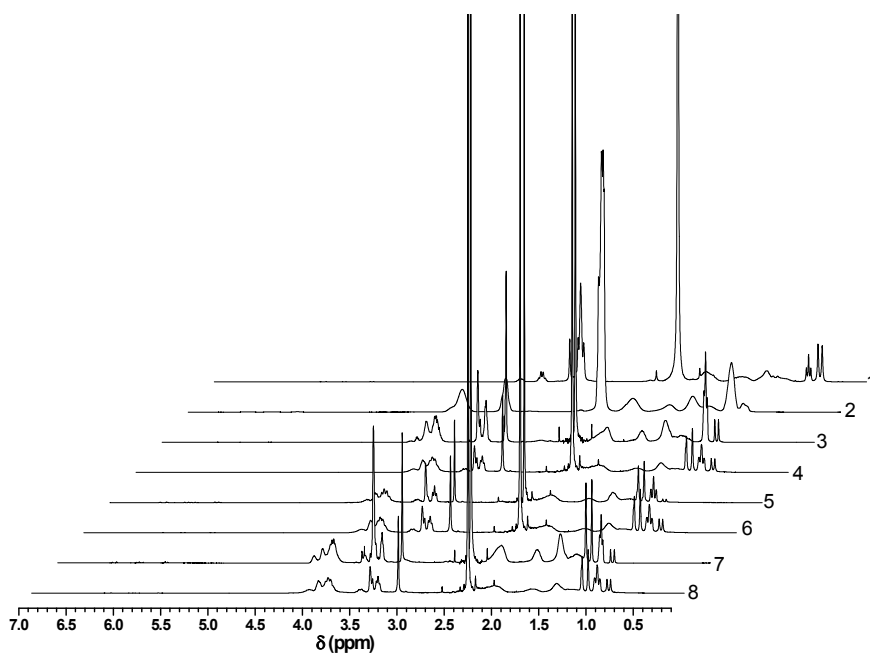

**Figure S13b:**  $^1\text{H}$  NMR spectra showing the monomer conversion for each cycle.

**Table S12:** Characterization data for the synthesis of the octablock copolymer obtained from UV experiment. Initial feed ratio =  $[\text{MA}]:[\text{EBiB}]:[\text{CuBr}_2]:[\text{Me}_6\text{-Tren}] = [10]:[1]:[0.02]:[0.12]$  in DMSO at ambient temperature.

| Cycle | Multiblock copolymer composition                                                                                                                         | Time (h) | Monomer conversion <sup>a</sup> (%) | $M_{n,\text{th}}$ [g mol <sup>-1</sup> ] | $M_{n,\text{GPC}}$ <sup>b</sup> [g mol <sup>-1</sup> ] | $\mathcal{D}$ |
|-------|----------------------------------------------------------------------------------------------------------------------------------------------------------|----------|-------------------------------------|------------------------------------------|--------------------------------------------------------|---------------|
| 1     | Poly(MA <sub>10</sub> )                                                                                                                                  | 2        | 100                                 | 1060                                     | 700                                                    | 1.22          |
| 2     | Poly(MA <sub>10</sub> -EA <sub>10</sub> )                                                                                                                | 6        | 100                                 | 2100                                     | 2000                                                   | 1.17          |
| 3     | Poly(MA <sub>10</sub> -EA <sub>10</sub> -EGA <sub>10</sub> )                                                                                             | 12       | 100                                 | 3400                                     | 3800                                                   | 1.10          |
| 4     | Poly(MA <sub>10</sub> -EA <sub>10</sub> -EGA <sub>10</sub> -SA <sub>10</sub> )                                                                           | 12       | 99                                  | 5200                                     | 5200                                                   | 1.13          |
| 5     | Poly(MA <sub>10</sub> -EA <sub>10</sub> -EGA <sub>10</sub> -SA <sub>10</sub> -EA <sub>10</sub> )                                                         | 12       | 97                                  | 6200                                     | 8000                                                   | 1.11          |
| 6     | Poly(MA <sub>10</sub> -EA <sub>10</sub> -EGA <sub>10</sub> -SA <sub>10</sub> -EA <sub>10</sub> -EGA <sub>10</sub> )                                      | 14       | 99                                  | 7600                                     | 11500                                                  | 1.05          |
| 7     | Poly(MA <sub>10</sub> -EA <sub>10</sub> -EGA <sub>10</sub> -SA <sub>10</sub> -EA <sub>10</sub> -EGA <sub>10</sub> -SA <sub>10</sub> )                    | 16       | 97                                  | 9400                                     | 10800                                                  | 1.29          |
| 8     | Poly(MA <sub>10</sub> -EA <sub>10</sub> -EGA <sub>10</sub> -SA <sub>10</sub> -EA <sub>10</sub> -EGA <sub>10</sub> -SA <sub>10</sub> -EGA <sub>10</sub> ) | 24       | 99                                  | 11200                                    | 15900                                                  | 1.36          |

<sup>a</sup>Determined by <sup>1</sup>H NMR. <sup>b</sup>Determined by CHCl<sub>3</sub> SEC analysis.

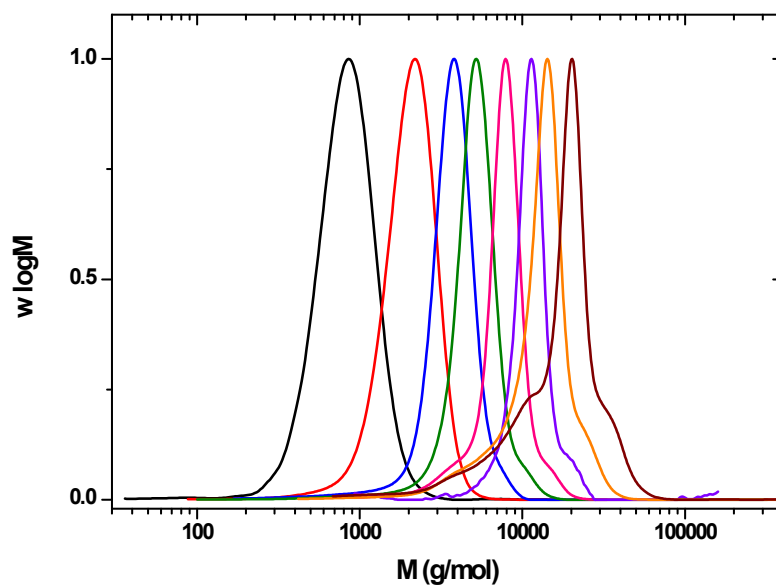

**Figure S14a:** Molecular weight distributions for successive cycles during synthesis of octablock copolymer DP=10 in DMSO at ambient temperature. A fresh solution of  $[\text{CuBr}_2]:[\text{Me}_6\text{-Tren}] = [0.01]:[0.12]$ , was added together with the monomer upon every addition.

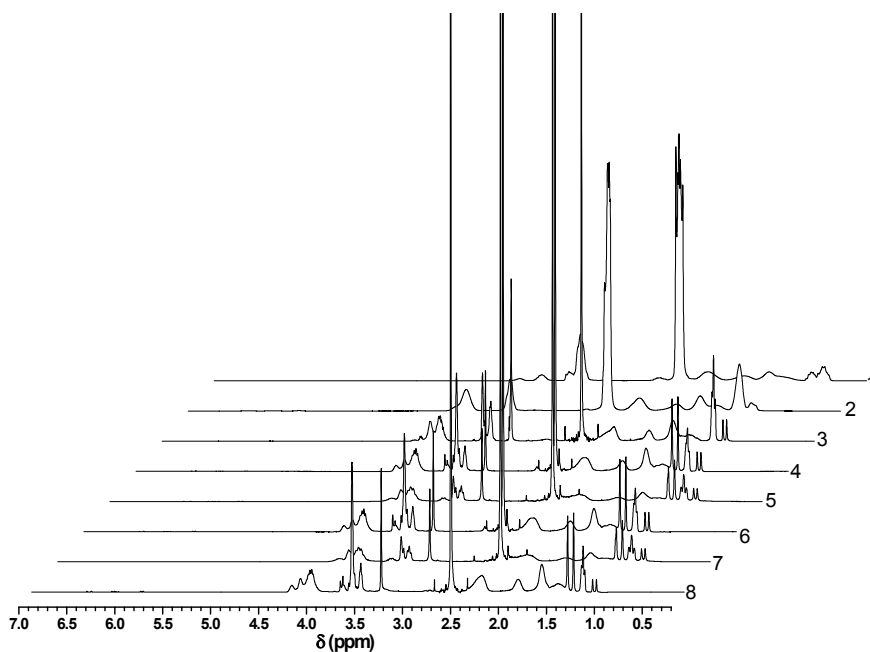

**Figure S14b:**  $^1\text{H}$  NMR spectra showing the monomer conversion for each cycle.

**Table S13:** Characterization data for the synthesis of the octablock copolymer obtained from UV experiment. Initial feed ratio =  $[\text{MA}]:[\text{EBiB}]:[\text{CuBr}_2]:[\text{Me}_6\text{-Tren}] = [10]:[1]:[0.01]:[0.12]$  in DMSO at ambient temperature.

| Cycle | Multiblock copolymer composition                                                                                                     | Time (h) | Monomer conversion <sup>a</sup> (%) | $M_{n,\text{th}}$ [ $\text{g mol}^{-1}$ ] | $M_{n,\text{GPC}}$ <sup>b</sup> [ $\text{g mol}^{-1}$ ] | $\bar{D}$ |
|-------|--------------------------------------------------------------------------------------------------------------------------------------|----------|-------------------------------------|-------------------------------------------|---------------------------------------------------------|-----------|
| 1     | Poly( $\text{MA}_{10}$ )                                                                                                             | 2        | 100                                 | 1060                                      | 800                                                     | 1.19      |
| 2     | Poly( $\text{MA}_{10}\text{-EA}_{10}$ )                                                                                              | 6        | 99                                  | 2100                                      | 1800                                                    | 1.19      |
| 3     | Poly( $\text{MA}_{10}\text{-EA}_{10}\text{-EGA}_{10}$ )                                                                              | 12       | 100                                 | 3400                                      | 3500                                                    | 1.11      |
| 4     | Poly( $\text{MA}_{10}\text{-EA}_{10}\text{-EGA}_{10}\text{-SA}_{10}$ )                                                               | 12       | 99                                  | 5200                                      | 4600                                                    | 1.15      |
| 5     | Poly( $\text{MA}_{10}\text{-EA}_{10}\text{-EGA}_{10}\text{-SA}_{10}\text{-EA}_{10}$ )                                                | 12       | 97                                  | 6200                                      | 7100                                                    | 1.12      |
| 6     | Poly( $\text{MA}_{10}\text{-EA}_{10}\text{-EGA}_{10}\text{-SA}_{10}\text{-EA}_{10}\text{-EGA}_{10}$ )                                | 14       | 99                                  | 7600                                      | 10000                                                   | 1.10      |
| 7     | Poly( $\text{MA}_{10}\text{-EA}_{10}\text{-EGA}_{10}\text{-SA}_{10}\text{-EA}_{10}\text{-EGA}_{10}\text{-SA}_{10}$ )                 | 16       | 99                                  | 9400                                      | 10500                                                   | 1.32      |
| 8     | Poly( $\text{MA}_{10}\text{-EA}_{10}\text{-EGA}_{10}\text{-SA}_{10}\text{-EA}_{10}\text{-EGA}_{10}\text{-SA}_{10}\text{-EGA}_{10}$ ) | 24       | 99                                  | 11200                                     | 14000                                                   | 1.36      |

<sup>a</sup>Determined by  $^1\text{H}$  NMR. <sup>b</sup>Determined by  $\text{CHCl}_3$  SEC analysis.



## DP=25

**Scheme S4:** Synthesis of **multiblock copolymers DP=25** by sequential addition of monomers without intermediate purification.

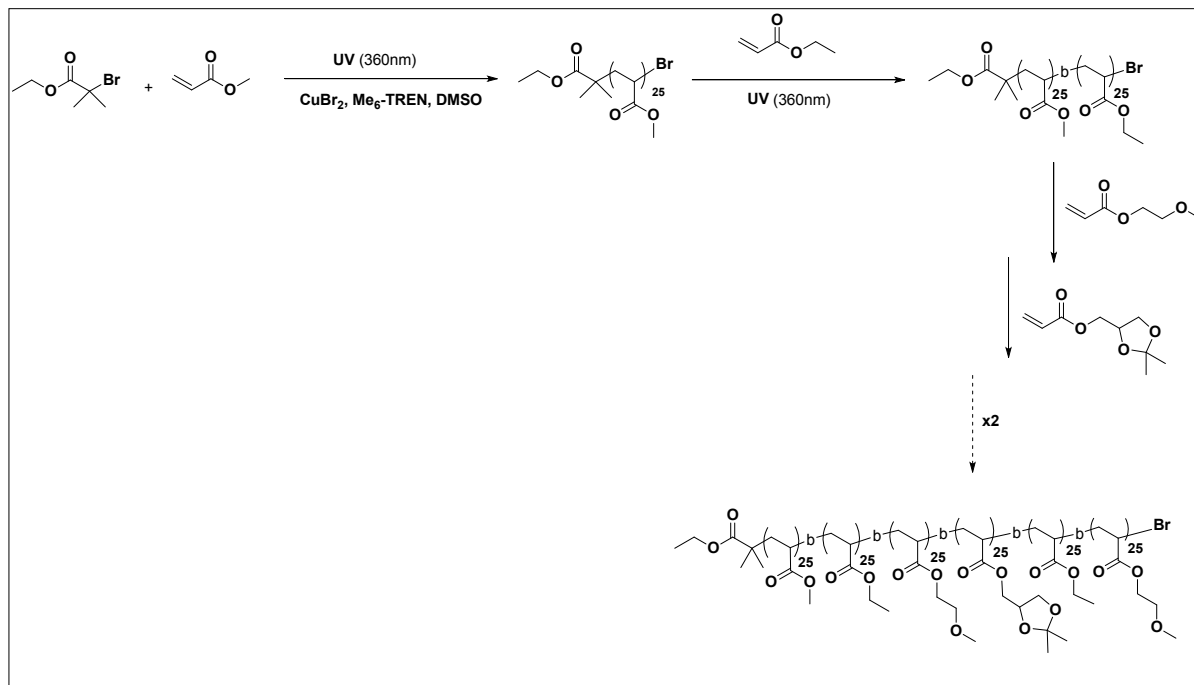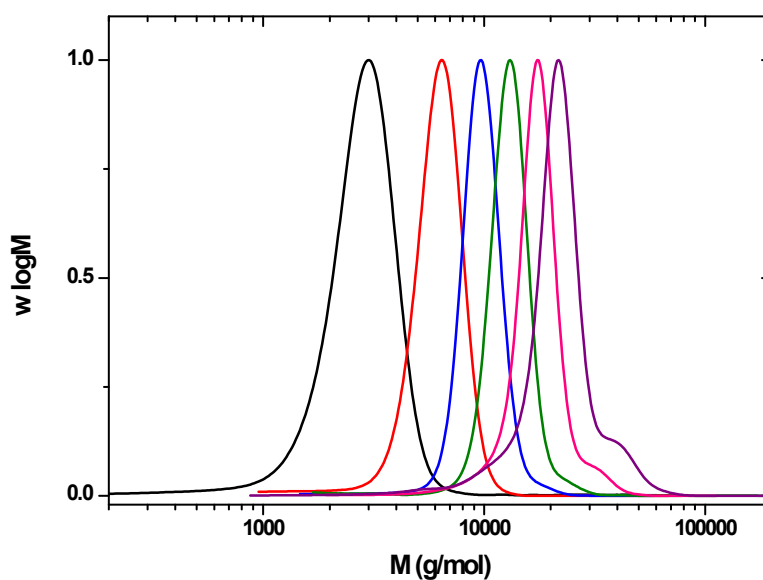

**Figure S15a:** Molecular weight distributions for successive cycles during synthesis of hexablock copolymer **DP=25** in DMSO at ambient temperature. A fresh solution of [CuBr<sub>2</sub>]:[Me<sub>6</sub>-Tren] = [0.02]:[0.12], was added together with the monomer upon every 2<sup>nd</sup> addition.

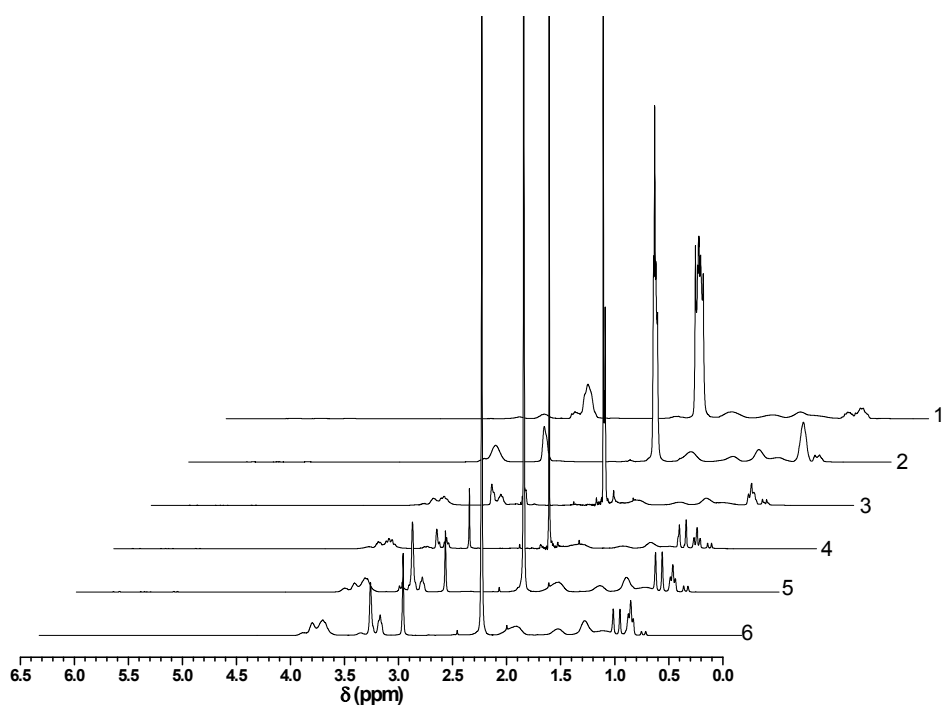

**Figure S15b:**  $^1\text{H}$  NMR spectra showing the monomer conversion for each cycle.

**Table S14:** Characterization data for the synthesis of the hexablock copolymer obtained from UV experiment. Initial feed ratio =  $[\text{MA}]:[\text{EBiB}]:[\text{CuBr}_2]:[\text{Me}_6\text{-Tren}] = [25]:[1]:[0.02]:[0.12]$  in DMSO at ambient temperature.

| Cycle | Multiblock copolymer composition                                                                      | Time (h) | Monomer conversion <sup>a</sup> (%) | $M_{n,\text{th}}$ [ $\text{g mol}^{-1}$ ] | $M_{n,\text{GPC}}$ <sup>b</sup> [ $\text{g mol}^{-1}$ ] | $\bar{D}$ |
|-------|-------------------------------------------------------------------------------------------------------|----------|-------------------------------------|-------------------------------------------|---------------------------------------------------------|-----------|
| 1     | Poly( $\text{MA}_{25}$ )                                                                              | 2        | 99                                  | 2400                                      | 2600                                                    | 1.14      |
| 2     | Poly( $\text{MA}_{25}\text{-EA}_{25}$ )                                                               | 4        | 99                                  | 4900                                      | 6000                                                    | 1.06      |
| 3     | Poly( $\text{MA}_{25}\text{-EA}_{25}\text{-EGA}_{25}$ )                                               | 7        | 98                                  | 8200                                      | 9500                                                    | 1.05      |
| 4     | Poly( $\text{MA}_{25}\text{-EA}_{25}\text{-EGA}_{25}\text{-SA}_{25}$ )                                | 8        | 99                                  | 12700                                     | 13000                                                   | 1.05      |
| 5     | Poly( $\text{MA}_{25}\text{-EA}_{25}\text{-EGA}_{25}\text{-SA}_{25}\text{-EA}_{25}$ )                 | 12       | 97                                  | 15200                                     | 16600                                                   | 1.08      |
| 6     | Poly( $\text{MA}_{25}\text{-EA}_{25}\text{-EGA}_{25}\text{-SA}_{25}\text{-EA}_{25}\text{-EGA}_{25}$ ) | 20       | 99                                  | 18200                                     | 19900                                                   | 1.15      |

<sup>a</sup>Determined by  $^1\text{H}$  NMR. <sup>b</sup>Determined by  $\text{CHCl}_3$  SEC analysis.

## DP=100

**Scheme S5:** Synthesis of **multiblock copolymers DP=100** by sequential addition of monomers without intermediate purification.

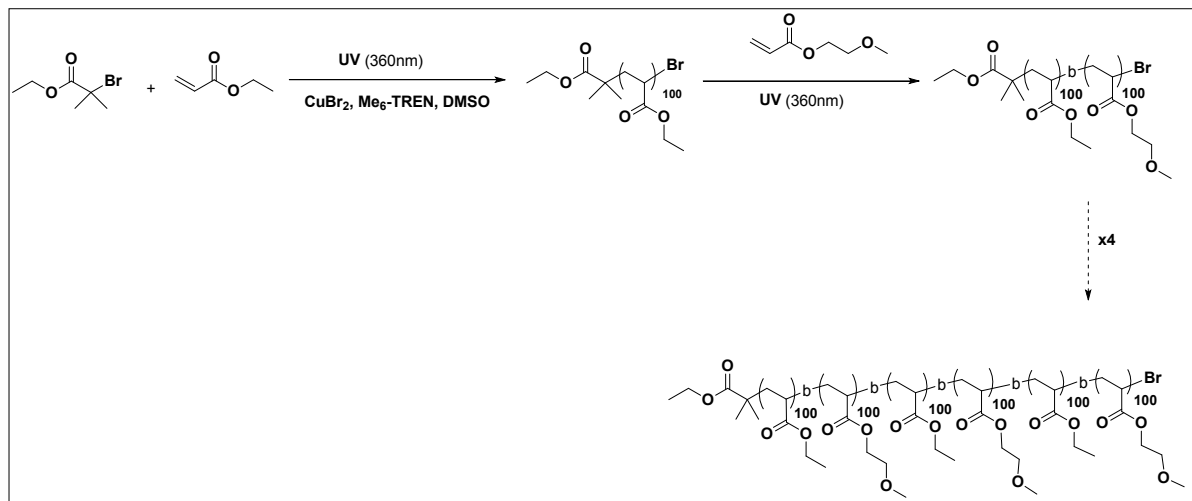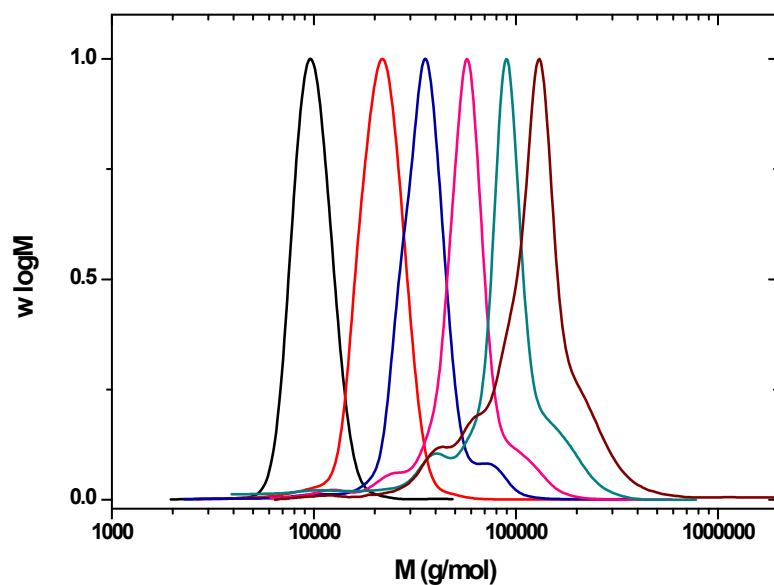

**Figure S16a:** Molecular weight distributions for successive cycles during synthesis of hexablock copolymer **DP=100** in DMSO at ambient temperature. A fresh solution of  $[\text{CuBr}_2]:[\text{Me}_6\text{-Tren}] = [0.02]:[0.12]$ , was added together with the monomer upon every 2<sup>nd</sup> addition.

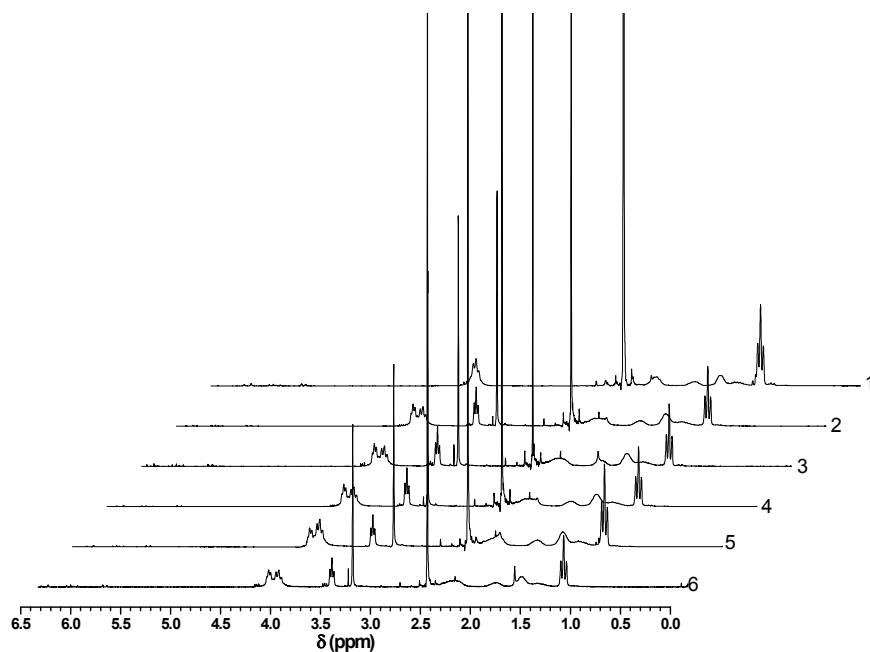

**Figure S16b:**  $^1\text{H}$  NMR spectra showing the monomer conversion for each cycle.

**Table S15:** Characterization data for the synthesis of the hexablock copolymer obtained from UV experiment. Initial feed ratio =  $[\text{MA}]:[\text{EBiB}]:[\text{CuBr}_2]:[\text{Me}_6\text{-Tren}] = [100]:[1]:[0.02]:[0.12]$  in DMSO at ambient temperature.

| Cycle | Multiblock copolymer composition                                                                           | Time (h) | Monomer conversion <sup>a</sup> (%) | $M_{n,\text{th}}$ [ $\text{g mol}^{-1}$ ] | $M_{n,\text{GPC}}$ <sup>b</sup> [ $\text{g mol}^{-1}$ ] | $\bar{D}$ |
|-------|------------------------------------------------------------------------------------------------------------|----------|-------------------------------------|-------------------------------------------|---------------------------------------------------------|-----------|
| 1     | Poly(EA <sub>100</sub> )                                                                                   | 3        | 98                                  | 10200                                     | 9600                                                    | 1.05      |
| 2     | Poly(EA <sub>100</sub> -OEGMA <sub>100</sub> )                                                             | 8        | 99                                  | 23200                                     | 21000                                                   | 1.08      |
| 3     | Poly(EA <sub>100</sub> -OEGMA <sub>100</sub> -EA <sub>100</sub> )                                          | 12       | 98                                  | 33200                                     | 37000                                                   | 1.17      |
| 4     | Poly(EA <sub>100</sub> -OEGMA <sub>100</sub> -EA <sub>100</sub> -OEGMA <sub>100</sub> )                    | 15       | 99                                  | 46200                                     | 52000                                                   | 1.18      |
| 5     | Poly(EA <sub>100</sub> -OEGMA <sub>100</sub> -EA <sub>100</sub> -OEGMA <sub>100</sub> -EA <sub>100</sub> ) | 24       | 97                                  | 56200                                     | 80000                                                   | 1.21      |
| 6     | Poly(EA <sub>100</sub> -OEGMA <sub>100</sub> -EA <sub>100</sub> -OEGMA <sub>100</sub> -EA <sub>100</sub> ) | 48       | 85                                  | 59200                                     | 102000                                                  | 1.33      |

<sup>a</sup>Determined by  $^1\text{H}$  NMR. <sup>b</sup>Determined by  $\text{CHCl}_3$  SEC analysis.

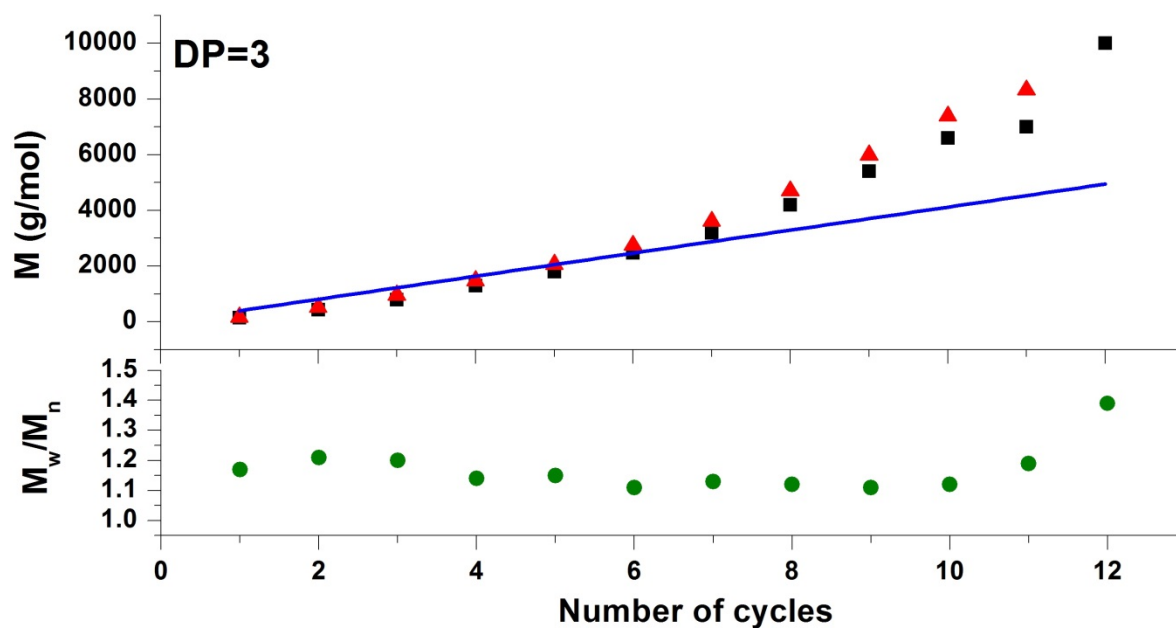

**Figure S17:** Evolution of theoretical (blue straight line) and experimental molecular weight ( $M_n$  (■) and  $M_w$  (▲) determined by SEC and  $M_w/M_n$  (●) versus the number of cycles during synthesis of dodecablock homopolymer **DP=3** in DMSO at ambient temperature. A fresh solution of  $[\text{CuBr}_2]:[\text{Me}_6\text{-Tren}] = [0.02]:[0.12]$ , was added together with the monomer upon every 3<sup>rd</sup> addition.

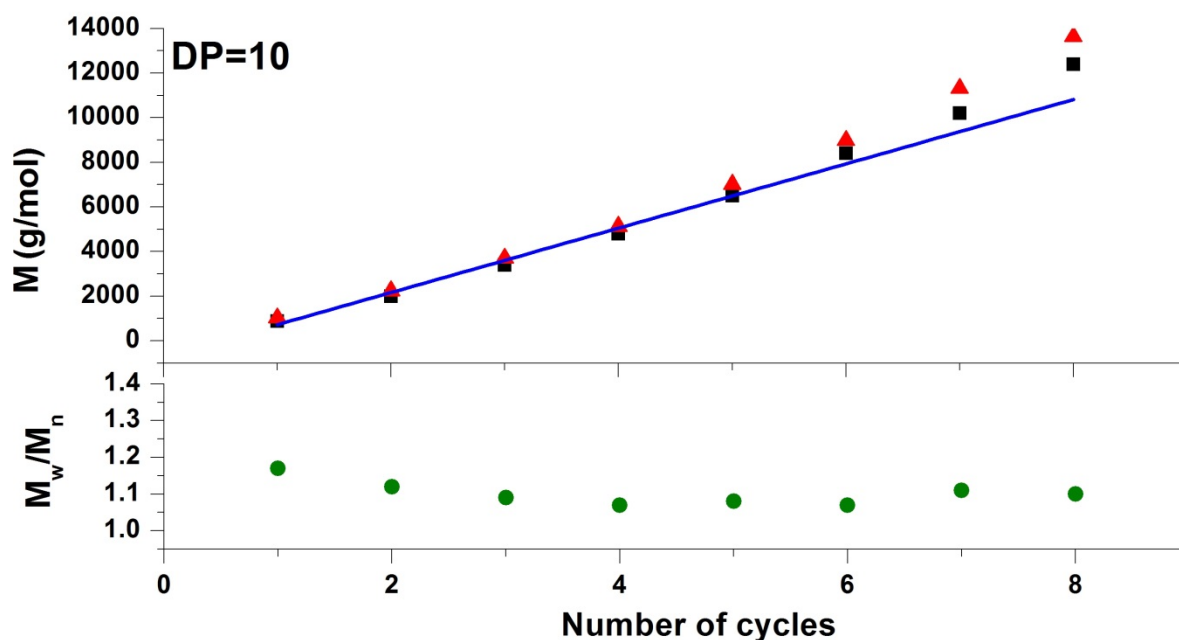

**Figure S18:** Evolution of theoretical (blue straight line) and experimental molecular weight ( $M_n$  (■) and  $M_w$  (▲) determined by SEC and  $M_w/M_n$  (●) versus the number of cycles during synthesis of octablock copolymer **DP=10** in DMSO at ambient temperature. A fresh solution of  $[\text{CuBr}_2]:[\text{Me}_6\text{-Tren}] = [0.02]:[0.12]$ , was added together with the monomer upon every 2<sup>nd</sup> addition.

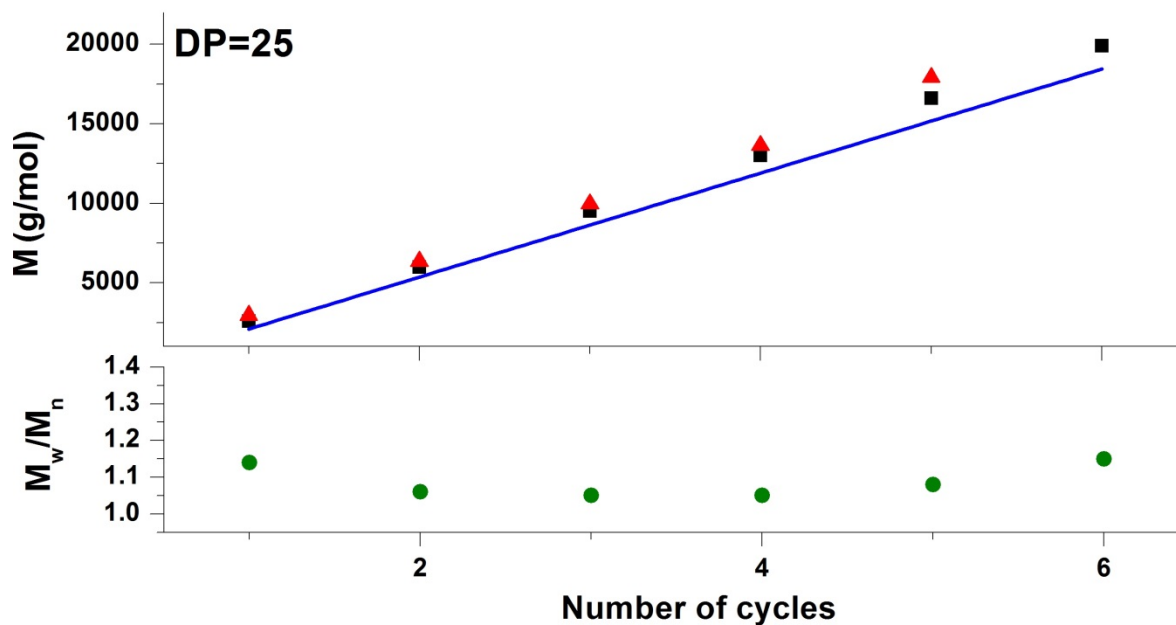

**Figure S19:** Evolution of theoretical (blue straight line) and experimental molecular weight ( $M_n$  (■) and  $M_w$  (▲) determined by SEC and  $M_w/M_n$  (●) versus the number of cycles during synthesis of hexablock copolymer **DP=25** in DMSO at ambient temperature. A fresh solution of  $[\text{CuBr}_2]:[\text{Me}_6\text{-Tren}] = [0.02]:[0.12]$ , was added together with the monomer upon every 2<sup>nd</sup> addition.

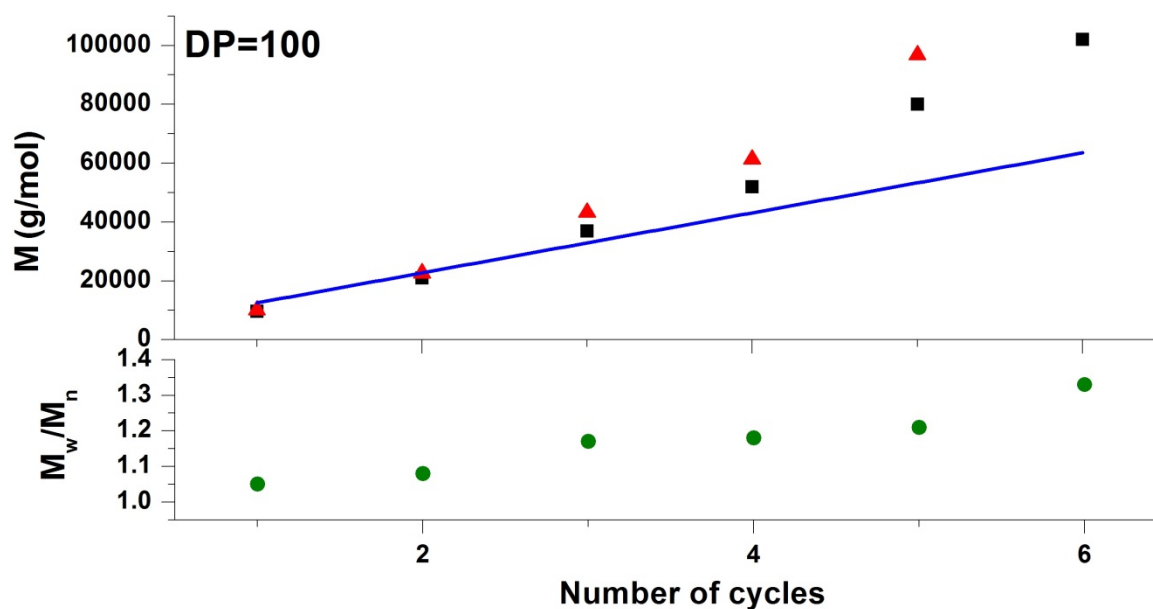

**Figure S20:** Evolution of theoretical (blue straight line) and experimental molecular weight ( $M_n$  (■) and  $M_w$  (▲) determined by SEC and  $M_w/M_n$  (●) versus the number of cycles during synthesis of

hexablock copolymer **DP=100** in DMSO at ambient temperature. A fresh solution of  $[\text{CuBr}_2]:[\text{Me}_6\text{Tren}] = [0.02]:[0.12]$ , was added together with the monomer upon **every 2<sup>nd</sup>** addition.

## References

1. M. Ciampolini and N. Nardi, *Inorg. Chem.*, 1966, 5, 41-44.
2. K. Oguchi, K. Sanui, N. Ogata, Y. Takahashi and T. Nakada, *Polym. Eng. Sci.*, 1990, 30, 449-452.
